## 1 **Convergent evolution between PALI1 and JARID2 for the allosteric activation of PRC2**

2 Qi Zhang<sup>1,3</sup>, Samuel C. Agius<sup>1,3</sup>, Sarena F. Flanigan<sup>1</sup>, Vitalina Levina<sup>1</sup>, Brady M. Owen<sup>1</sup>,  
3 Chen Davidovich<sup>1,2,\*</sup>

4

5 <sup>1</sup>Department of Biochemistry and Molecular Biology, Biomedicine Discovery Institute, Faculty of  
6 Medicine, Nursing and Health Sciences, Monash University, Clayton, Victoria, Australia; <sup>2</sup>EMBL-  
7 Australia and the ARC Centre of Excellence in Advanced Molecular Imaging, Clayton, Victoria,  
8 Australia; <sup>3</sup>These authors contributed equally; \*Correspondence to [chen.davidovich@monash.edu](mailto:chen.davidovich@monash.edu)

9

### 10 **ABSTRACT**

11 The polycomb repressive complex 2 (PRC2) is a histone methyltransferase that maintains cell  
12 identities. JARID2 is the only accessory subunit of PRC2 that known to trigger an allosteric activation  
13 of methyltransferase. Yet, this mechanism cannot be generalised to all PRC2 variants as, in  
14 vertebrates, JARID2 is mutually exclusive with most of the accessory subunits of PRC2. Here we  
15 provide functional and structural evidence that the vertebrate-specific PRC2 accessory subunit PALI1  
16 emerged through a convergent evolution to mimic JARID2 at the molecular level. Mechanistically,  
17 PRC2 methylates PALI1 K1241, which then binds to the PRC2-regulatory subunit EED to allosterically  
18 activate PRC2. PALI1 K1241 is methylated in mouse and human cell lines and is essential for PALI1-  
19 induced allosteric activation of PRC2. High-resolution crystal structures revealed that PALI1 mimics  
20 the regulatory interactions formed between JARID2 and EED. Independently, PALI1 also facilitates  
21 DNA and nucleosome binding by PRC2. In acute myelogenous leukemia cells, overexpression of  
22 PALI1 leads to cell differentiation, with the phenotype abrogated by a separation-of-function PALI1  
23 mutation, defective in allosteric activation and active in DNA binding. Collectively, we show that  
24 PALI1 facilitates catalysis and substrate binding by PRC2 and provide evidence that subunit-induced  
25 allosteric activation is a general property of holo-PRC2 complexes.

26

### 27 **INTRODUCTION**

28 Over the course of evolution, gene families tend to expand<sup>1</sup>. Accordingly, the number of genes  
29 linked to the same function is commonly increased in vertebrates with respect to invertebrates,  
30 especially in cases of genes coding for transcriptional regulators<sup>2,3</sup>. For instance, the histone H3K4  
31 methyltransferase MLL/COMPASS complex expanded from one in yeast to three sub-types in fly and  
32 six complexes in human, where additional subunits emerged through each expansion<sup>4</sup>. Similar  
33 expansion took place for the histone ubiquitin ligase polycomb repressive complex 1 (PRC1): from

34 two complexes in the fly to at least six variants in vertebrates<sup>5,6</sup>. Vertebrate-specific subunits of  
35 histone modifiers provide the opportunity to identify molecular mechanisms that are fundamental  
36 to chromatin biology and, therefore, re-emerged through the course of evolution.

37 The polycomb repressive complex 2 (PRC2) is a histone methyltransferase complex that is  
38 required for the maintenance of cell identity in all multicellular organisms. At the molecular level,  
39 PRC2 maintains the repressed state of developmentally expressed genes through the tri-methylation  
40 of lysine 27 in histone H3 (H3K27me3), a hallmark of facultative heterochromatin<sup>6,7</sup>. The core PRC2  
41 complex includes four subunits<sup>7-10</sup>, but it has a low histone methyltransferase activity and low  
42 affinity to DNA. Therefore, holo-PRC2 complexes include additional protein subunits—termed  
43 accessory subunits. Most of the accessory subunits of the vertebrate PRC2 emerged through gene  
44 duplication and some are vertebrate specific, with the latter poorly understood mechanistically.

45 The accessory subunits are collectively required for the recruitment of PRC2 to chromatin  
46 and for the regulation of its enzymatic activity<sup>11,12</sup>. Unbiased proteomic studies<sup>13-17</sup> revealed two  
47 distinct holo-PRC2 complexes—PRC2.1 and PRC2.2—defined by their mutually exclusive accessory  
48 subunits<sup>16</sup>. The PRC2.2 complex is nearly identical in fly and human, and includes the accessory  
49 subunits AEBP2 and JARID2. Contrarily to PRC2.2, the PRC2.1 complex went through a massive  
50 expansion over evolution: from one accessory subunit in fly, to at least five in vertebrates<sup>13-17</sup>. The fly  
51 PRC2.1 accompanies a single accessory subunit: Pcl. The vertebrate PRC2.1 is far more complex: it  
52 contains one of the three polycomb-like (PCL) proteins<sup>16</sup> (PHF1, MTF2 or PHF19) together with either  
53 EPOP<sup>13,16</sup> or PALI1<sup>16,18</sup> (also annotated as LCOR-CRA\_b, LCOR isoform 3 or C10ORF12). Recent works  
54 indicate some non-redundant functions of the PRC2.1 and PRC2.2 complexes in mouse embryonic  
55 cells<sup>11,12</sup>, but the molecular basis is unknown.

56 The PRC2.2-specific subunit JARID2 has two activities that were implicated in nucleating  
57 H3K27me3: chromatin binding<sup>19,20</sup> and allosteric stimulation of histone methyltransferase  
58 (HMTase)<sup>21</sup>. During JARID2-induced allosteric activation, PRC2 first di- or tri-methylates lysine 116 in  
59 JARID2 (JARID2-K116me2/3). Next, the di/tri-methyl-lysine binds to the regulatory subunit EED and  
60 triggers an allosteric activation of PRC2<sup>21</sup>. This mechanism is thought as a “jump-start” to activate  
61 PRC2<sup>8</sup>. After the nucleation of H3K27me3, histone tails carrying the H3K27me3 mark bind to the  
62 regulatory subunit EED<sup>22</sup> to trigger further allosteric activation of PRC2<sup>23</sup>. Yet, knockout of JARID2 in  
63 mouse ESC cells lacks major effect on H3K27me3 globally and locally<sup>11,21</sup>. This implies a parallel role  
64 taken by PRC2.1 during de novo introduction of H3K27me3, in agreement with the PRC2.1-specific  
65 subunit MTF2 being essential for this process<sup>11 24</sup>. Yet, a mechanism for subunit-induced allosteric  
66 activation of the PRC2.1 complex is yet to be discovered.

67 Multiple unbiased proteomic studies identified C10ORF12 as an accessory subunit of  
68 PRC2.1<sup>15,16,25</sup> and, thus, mutually exclusive with JARID2. More recently, C10ORF12 was annotated as  
69 PALI1 and identified as a vertebrate-specific protein, coded by a transcript of the *LCOR* locus<sup>18</sup>.  
70 Sequence homology pointed out a paralogue of PALI1, termed PALI2, encoded by the *LCORL* locus.  
71 PALI1 is required for mouse development<sup>18</sup> and promotes the histone methyltransferase (HMTase)  
72 activity of PRC2 *in vitro* and *in vivo*<sup>16,18</sup>, but the molecular mechanism is unknown.

73 Here, we show that PALI1 allosterically activates PRC2 and facilitates substrate binding.  
74 Mechanistically, PALI1 lysine 1241 is a substrate for PRC2 *in vitro* and is methylated in multiple  
75 human and mouse cell lines. Once in a di- or tri-methyl-form, PALI1-K1241me<sub>2/3</sub> binds to the  
76 regulatory subunit EED and allosterically activates PRC2. Structural and functional evidence indicates  
77 that PALI1 has emerged through a convergent evolution to mimic the function of JARID2 within the  
78 context of the PRC2.1 complex. We also show that the PRC2-binding domain of PALI1 increases the  
79 affinity of PRC2 to DNA and mono-nucleosome substrates by >10-fold. Allosteric activation and  
80 chromatin binding are two separate functions of PALI1, demonstrated by a separation-of-function  
81 PALI1 mutant: defective in allosteric activation but active in substrate binding. This separation of  
82 function PALI1 mutant abrogates PALI1-induced cell differentiation, demonstrating a molecular  
83 function of subunit-induced allosteric activation in cells. Our results reveal how PRC2 is regulated by  
84 PALI1 at the molecular level and, more broadly, implies that subunit-induced allosteric activation is  
85 permitted in most variants of holo-PRC2 complexes in vertebrates.

86

## 87 RESULTS

### 88 PALI1 K1241 is methylated in mouse and human cell lines

89 In a search for a PRC2.1 accessory subunit that could trigger an allosteric activation of PRC2, we first  
90 set out to map the PRC2 methylome in mouse and human cells. We reasoned that affinity  
91 purification of PRC2 followed by tandem mass spectrometry (AP-MS), will allow for the identification  
92 of methyl-lysines residing within assembled PRC2 complexes *in vivo*. Hence, we analysed multiple  
93 publicly available LC-MS/MS data originating from AP-MS experiments, where PRC2 subunits were  
94 used as baits<sup>15,26-29</sup> (Fig. 1a and Supplementary Table 1). Although these studies<sup>15,26-29</sup> were not  
95 focused on the methylation of PRC2 subunits, the high quality of the raw data allowed us to detect  
96 methyl-lysines in tryptic peptides (Supplementary Table 1). As expected, the PRC2 methylome  
97 contains the previously reported methylations in JARID2 K116<sup>21</sup> and EZH2 K514 and K515<sup>30-32</sup>.

98           The two most frequently detected di- and tri-methyl lysines in the accessory subunits of  
99   PRC2 were in JARID2 K116 and PALI1 K1241 (Fig 1a), with the former triggering an allosteric  
100   activation of PRC2<sup>21</sup>. Specifically, PALI1 K1241 is methylated in five of the seven cell lines that were  
101   tested, including both human and mouse cell lines: HEK293T (human embryonic kidney), STS26T  
102   (human malignant peripheral nerve sheath tumour), LnCAP (human prostate cancer), U2OS (human  
103   osteosarcoma) and mouse embryonic stem cells (mESC). In four of these cell lines, PALI1 K1241  
104   identified either in its di- or tri-methyl form (i.e. PALI1 K1241me<sub>2/3</sub>).

105           In some of the cell lines, we also identified methylations in PALI1 K1214 and K1219, in  
106   agreement with a previous proteomic analysis in HCT116 cells<sup>30</sup>. The same study also identified  
107   methylations of EZH2 K510 and K515, that have more recently been shown to regulate PRC2<sup>31,32</sup>. Yet,  
108   K1241 was not identified in that study<sup>30</sup>, which used antibodies against methyl-lysines for  
109   immunoaffinity purification ahead of the mass spectrometry<sup>30</sup>.

110           Hence, PALI1 and JARID2 were the only accessory subunits that were identified with di- or  
111   tri-methyl lysin modifications that are evolutionary conserved in mouse and human (Fig. 1a). Di- and  
112   tri-methylated JARID2 K116 (JARID2 K116me<sub>2/3</sub>) allosterically activate the PRC2.2 complex through  
113   direct interactions with the regulatory subunit EED<sup>21</sup>. With that in mind, we set out to test the  
114   hypothesis that a methyl-lysines in PALI1 allosterically activates the PRC2.1 complex.

#### 115   **PALI1 K1241 is methylated by PRC2 *in vitro***

116   We next set out to determine if PALI1 can be methylated by PRC2. We expressed and purified a  
117   recombinant human PRC2 (EZH2, EED, SUZ12 and RBBP4) in a complex with the PRC2-interacting  
118   region from PALI1 (PALI1<sub>PIR</sub>; Fig. 1b). *In vitro* HMTase assay using mononucleosome substrates (Fig.  
119   1c) confirmed that the PRC2-PALI1<sub>PIR</sub> complex, comprising amino acids 1058-1250 from PALI1 (purple  
120   bar in Fig. 1a), is substantially more active than the core PRC2 complex. While this result is in  
121   agreement with previous reports<sup>16,18,33</sup>, we also noted an additional band on the radiogram (Fig. 1c,  
122   marked with an asterisk). That band indicated a methylated protein that appeared only if PRC2  
123   contained PALI1<sub>PIR</sub>, and migrated with the apparent molecular weight of PALI1<sub>PIR</sub>. In order to confirm  
124   that the methylated protein is indeed PALI1<sub>PIR</sub>, we purified a PRC2-PALI1<sub>PIR</sub> complex with a 3C-  
125   cleavable MBP tag carried only by PALI1<sub>PIR</sub>. We then performed the HMTase assay in the presence  
126   and absence of human rhinovirus 3C protease. The 3C-specific cleavage of the MBP-tag on PALI1<sub>PIR</sub>  
127   led to a large shift in the migration velocity of the methylated protein, confirming it is indeed  
128   PALI1<sub>PIR</sub> (Fig. 1c, lane 2 versus lane 3).

129 A similar result was obtained when we performed the same experiment using a longer  
130 truncation of PALI1 that was designed based on the previous mapping of the PRC2-interacting region  
131 from PALI1<sup>18</sup> (PALI1 1058-1329; termed PALI1<sub>PIR-long</sub> herein; long purple bar in Fig. 1a). PALI1<sub>PIR-long</sub> co-  
132 purified with PRC2 as a soluble complex (Supplementary Fig. 1a, b), albeit in multiple truncated  
133 forms. In-gel digestion with mass spectrometry subsequently identified PALI1<sub>PIR</sub> as a more stable  
134 truncation of PALI1<sub>PIR-long</sub>, while both constructs co-purified with PRC2 and enhanced HMTase (Fig. 1c  
135 and Supplementary Fig. 1c). These experiments confirmed that PALI1<sub>PIR</sub> is sufficient to enhance the  
136 HMTase activity of PRC2 towered mononucleosome substrates and that PRC2 methylates PALI1<sub>PIR</sub> *in*  
137 *vitro*.

138 In order to identify the methylated amino acids within PALI1, we performed liquid  
139 chromatography with tandem mass spectrometry (LC-MS/MS) analysis of the recombinant PRC2-  
140 PALI1<sub>PIR-long</sub>. As expected, we detected the previously reported methyl-lysines in EZH2 K514 and  
141 K515<sup>31,32</sup> (Supplementary Table 1). In PALI1<sub>PIR-long</sub>, we identified mono- and di-methylations in K1214,  
142 K1219 and K1241 (Fig. 1a, Supplementary Table 1 and Supplementary notes for the MS/MS spectra),  
143 in agreement with our proteomic analysis of *in vivo* AP-MS data (Fig 1a). Additionally, K1214 and  
144 K1219 were detected also in tri-methyl forms. These methylations were identified either if the  
145 complex was pre-incubated with SAM or if not, indicating that a significant fraction of the complex  
146 was purified with these modifications (Supplementary Table 1). A similar observation was previously  
147 made for EZH2 automethylation, that occurs in the recombinant protein while co-expressed with  
148 other PRC2 subunits<sup>31</sup>. These results confirm that three lysines within the PRC2-interacting region of  
149 PALI1 serve as a substrate for PRC2, including K1214, K1219 and K1241.

#### 150 **PALI1 K1241 is required in order to enhance the HMTase activity of PRC2**

151 If methyl-lysines in PALI1 allosterically activate PRC2, the corresponding lysine residues are expected  
152 to be required for PALI1-mediated enhancement of HMTase. We, therefore, aimed to determine if  
153 the candidate lysine residues that we identified using MS/MS (Fig. 1a) are required or dispensable  
154 for PALI1-mediated enhancement of HMTase. We expressed and purified PRC2-PALI1<sub>PIR-long</sub> mutant  
155 complexes, included all possible perturbations of the PALI1 mutations K1214A, K1219A or K1241A.  
156 Mutant complexes migrated on a gel filtration column similar to the wild type, excluding adverse  
157 effects on complex solubility (Supplementary Fig. 2a). To assess the ability of these lysine-to-alanine  
158 mutants to enhance HMTase, we carried out an *in vitro* HMTase assay using mononucleosomes as a  
159 substrate. The mutation K1241A in PRC2-PALI1<sub>PIR-long</sub> lead to approximately 50% reduction in HMTase  
160 activity, compared to the wild type PRC2-PALI1<sub>PIR-long</sub> complex (Fig. 2a). The two other lysine-to-  
161 alanine mutants, K1214A and K1219A, did not affect the HMTase activity of the PRC2-PALI1<sub>PIR-long</sub>

162 complex (Fig. 2a). The K1241A mutant significantly reduced PALI1-mediated enhancement of  
163 HMTase in all possible perturbations that we tested, with the other two lysines, K1214 and K1219,  
164 were dispensable for methyltransferase enhancement.

165 Of note, while the mutation K1241A in PALI1 significantly reduced the HMTase activity of  
166 PRC2, the PRC2-PALI<sub>PIR-long</sub> K1241A mutant complex was still about 10-fold more active than the core  
167 PRC2 complex (Fig. 2a). Collectively, these data indicate that K1241 is required for complete PALI1-  
168 mediated HMTase enhancement, and implies the presence of an additional mechanism,  
169 independent of K1241 methylation (more below).

### 170 **PALI1-K1241me<sub>2/3</sub> is sufficient in order to stimulate the HMTase activity of PRC2**

171 If the methylation of PALI1 K1241 is sufficient to trigger an allosteric activation of PRC2, we expected  
172 to mimic these regulatory interactions by using a short peptide, including a tri-methyl-lysine K1241  
173 flanked by amino acids of the corresponding sequence from PALI1 (termed PALI1-K1241me<sub>3</sub> peptide  
174 herein). Indeed, the PALI1-K1241me<sub>3</sub> peptide significantly stimulated the HMTase activity of PRC2  
175 towered mononucleosome substrates (Fig. 2b). Similar observations were made in the past for  
176 H3K27me<sub>3</sub> and JARID2-K116me<sub>2/3</sub> peptides, which allosterically activate PRC2<sup>21,23</sup>. We also assayed  
177 a PALI1-K1219me<sub>3</sub> peptide, which has a smaller positive effect on the HMTase activity of PRC2. The  
178 PALI1-K1214me<sub>3</sub> peptide was ineffective in stimulating PRC2 (Fig. 2b). Another peptide, including tri-  
179 methylations on both K1219 and K1214, exhibited only a moderate stimulation of HMTase (Fig. 2b).  
180 As expected, no stimulation of HMTase observed by unmethylated wild type or lysine-to-arginine  
181 mutant K1241 peptides that were used as negative controls (Fig. 2c).

182 The level of PALI1 K1241 methylation ranges from mono- to tri-methyl-lysine in different  
183 human and mouse cell lines (Fig. 1a and Supplementary Table 1). To determine how the methylation  
184 level of PALI1 K1241 affects its ability to stimulate PRC2, we assayed the HMTase activity of the core  
185 PRC2 complex in the presence of unmethylated, mono-, di- and tri-methyl-lysine PALI1 K1241  
186 peptides (PALI1 K1241me<sub>0-3</sub>, respectively; Fig. 2d). While the unmethylated peptide (PALI1-  
187 K1241me<sub>0</sub>) did not stimulate PRC2, any additional methyl up to the di-methyl form (PALI1-  
188 K1241me<sub>2</sub>) increased the HMTase activity of PRC2 (Fig. 2d). While the tri-methyl peptide (PALI1-  
189 K1241me<sub>3</sub>) was still efficient in HMTase stimulation, it did not increase the HMTase activity of PRC2  
190 further beyond the di-methyl peptide (Fig. 2d). Taken together, these results indicate that PALI1-  
191 K1241me<sub>2/3</sub> is sufficient to stimulate the HMTase activity of PRC2.

### 192 **PALI1-K1241me<sub>2/3</sub> binds to the aromatic cage of the regulatory subunit EED to stimulate PRC2**

193 H3K27me3 and JARID2-K116me2/3 bind to the aromatic cage of the regulatory subunit EED to  
194 allosterically stimulate PRC2<sup>21,23</sup>. We, therefore, wished to determine if there is a direct link between  
195 PALI1-K1241me2/3 and EED. We first measured the affinity of EED (amino acids 40-441) for 5-  
196 carboxyfluorescein- (5-FAM, single isomer) labelled JARID2-K116me3 peptide using fluorescence  
197 anisotropy direct titrations. The JARID2-K116me3 peptide binds to EED with a dissociation constant  
198 ( $K_d$ ) of  $8.07 \pm 0.49 \mu\text{M}$  (Fig. 3a and Supplementary Fig. 3a), consistent with previously published  
199 results<sup>21</sup>. Then, we quantified the  $K_d$  of unlabelled peptides, using fluorescence anisotropy  
200 displacement titrations (Fig. 3a). As a positive control, we first quantified the affinity of an  
201 H3K27me3 peptide for EED, resulting with  $K_d = 41.3 \pm 2.8 \mu\text{M}$ , in agreement with a previous study<sup>21</sup>.  
202 The affinity of EED for PALI1-K1241me3 ( $K_d = 8.47 \mu\text{M} \pm 0.71 \mu\text{M}$ ) is similar to the affinity of EED for  
203 the JARID2-K116me3 peptide ( $K_d = 8.07 \mu\text{M} \pm 0.49 \mu\text{M}$ ; Fig. 3a and Supplementary Fig. 3a). We  
204 observed weak interaction between mono-methylated K1241 peptide to EED ( $K_d = 240 \pm 38 \mu\text{M}$ ),  
205 while the di-methyl form increased the affinity for EED by approximately 10-fold ( $K_d = 18.8 \pm 2.3 \mu\text{M}$ ),  
206 almost to the level of the K1241 tri-methyl-lysine peptide ( $K_d = 8.47 \mu\text{M} \pm 0.71 \mu\text{M}$ ) (Fig. 3a).  
207 Qualitatively, these results are in agreement with the HMTase assays done in the presence of these  
208 peptides (Fig. 2d) and support a model where PALI1 K1241me2/3 binds to EED to stimulate the  
209 HMTase activity of PRC2.

210 The PALI1-K1219me3 peptide binds to EED with high affinity ( $K_d = 7.53 \mu\text{M} \pm 0.71 \mu\text{M}$ ; Fig.  
211 3a), in agreement with its ability to stimulate PRC2 (Fig. 2b). Contrarily, the PALI1-K1214me3  
212 peptides, which did not stimulate methyltransferase (Fig. 2b), binds to EED with a 4-fold lower  
213 affinity comparing PALI1-K1219me3 and PALI1-K1241me3 (Fig. 3a).

214 In order to directly link between PALI1 K1241me3 and the aromatic cage of EED within the  
215 context of PRC2, we reconstituted mutant PRC2 complex harbouring the defective cage mutation  
216 EED F97A<sup>23</sup>. The PALI1-K1241me3 peptide did not lead to the activation of the cage mutant PRC2  
217 (Fig. 3b), in agreement with an EED-dependent allosteric activation of PRC2. On the same line of  
218 evidence, PALI1-K1241me3-induced activation of PRC2 was inhibited by an allosteric inhibitor of  
219 PRC2, A-395, but not the negative control A-395N<sup>34</sup> (Supplementary Fig. 3b). Collectively, our data  
220 support a mechanism where PALI1 K1241me2/3 binds to the aromatic cage in EED to trigger an  
221 allosteric activation of PRC2.

## 222 **PALI1 and JARID2, but not H3, utilise the same interactions with the regulatory subunit EED**

223 Given the functional identity between PALI1-K1241me3 and -K1219me3 to JARID2-K116me3, we  
224 wished to assess for structural resemblance. We, therefore, solved the crystal structures of EED<sub>76-441</sub>  
225 co-crystallized with a PALI1-K1241me3 or PALI1-K1219me3 peptide (Fig. 3c and Table 1). We

226 compared the resulted structures with the crystal structures of the EED-H3K27me3 and EED-JARID2-  
227 K116me3 complexes. The structures indicate that the two tri-methyl-lysine PALI1 peptides (Fig. 3c,  
228 left two panels, and Supplementary Fig. 3c) bind to EED in a conformation resembling that seen for  
229 the JARID2-K116me3 peptide (Fig. 3c, the third panel). Specifically, in all three cases the tri-methyl-  
230 lysine and its adjacent aromatic residue, in the +1 position, adopting the same conformation when  
231 binding to EED (Fig. 3c, marked in dashed shapes). Contrarily, H3K27me3, does not have an aromatic  
232 residue at position +1, with respect to the tri-methyl-lysine, thus adopts a different binding mode to  
233 EED (Fig. 3c, right). Altogether, these structures indicate that PALI1 and JARID2 interact with EED  
234 using their tri-methyl-lysine and its adjacent aromatic residue, despite no other sequence similarity  
235 and no common ancestor (Fig. 3d and Supplementary Fig. 3d). Of note PALI1-K1241 and the adjacent  
236 F1242, but not PALI1-K1214 or PALI1-K1219, are fully conserved across different vertebrate species  
237 (Fig. 3d). This implies for a biological significance of PALI1-K1241me<sub>2/3</sub> in regulating PRC2 across  
238 vertebrates.

### 239 **PALI1 facilitates DNA binding by PRC2, with allosteric activation being dispensable for this function**

240 The triple mutant complex, PRC2-PALIP<sub>IR-long</sub> K1241A, K1219A and K1241A, is defective in allosterically  
241 stimulating HMTase but was still more active than the core PRC2 complex (Fig. 2a). This mutant  
242 complex cannot harbour any of the methylations that we identified in PALI1 (Fig. 1a). Hence, we  
243 suspected that the PRC2-interacting region within PALI1 regulates HMTase in an additional  
244 mechanism. In vitro HMTase assays previously demonstrated that the HMTase activity of PRC2 is  
245 enhanced by several of its DNA-binding accessory subunits, including MTF2, PHF19 and AEBP2<sup>35</sup>. We  
246 therefore wished to determine if the PRC2-interacting region of PALI1 increases the affinity of PRC2  
247 to DNA.

248 To directly test if the PRC2-interacting region of PALI1 can facilitate DNA binding, we first set  
249 out to quantify the affinity of PRC2-PALI1<sub>PIR</sub> to DNA using fluorescence anisotropy. We used a DNA  
250 probe designed to mimic 46 bases long dsDNA from a CpG island of the CDKN2B gene (termed  
251 CpG46 DNA, see methods section for the DNA sequence). The affinity of the PRC2-PALI1<sub>PIR</sub> to CpG46  
252 DNA ( $K_d = 155 \pm 26$  nM) was >20-fold higher than the affinity to the PRC2 core complex to the same  
253 DNA probe ( $K_d > 4$   $\mu$ M) (Fig. 4a), indicating that PALI1 facilitates DNA binding. The DNA-binding  
254 activity of PALI1 was not specific to the CpG46 DNA probe: PRC2-PALI1<sub>PIR</sub> binds to DNA tightly even  
255 after the DNA probe was mutated to disrupt all the CpG sequences and to reduce the GC content  
256 from 79% to 21% (CpG46 mt DNA, see methods section for DNA sequence), with  $K_d = 73.7 \pm 10.0$  nM  
257 for CpG46 mt DNA (Fig. 4a). Conversely, PALI1<sub>PIR</sub> did not significantly increase the affinity of PRC2 to  
258 a G-tract RNA (Supplementary Fig. 4a), which interacts with core PRC2 subunits<sup>35,36</sup>. Accordingly, this



259 data indicates that the PRC2-interacting region of PALI1 facilitates high-affinity interactions between  
260 PRC2 and DNA, not RNA, without an apparent DNA-sequence selectivity.

261           Given that PALI1 facilitates DNA binding (Fig. 4a), we next wished to determine if PALI1  
262 could facilitate substrate binding. We performed electrophoretic mobility-shift assays (EMSA) using a  
263 fluorescently labelled mononucleosome probe that was reconstituted using a 182 bp long DNA. The  
264 probe was reconstituted to allow for the simultaneous detection of the interactions between PRC2  
265 and nucleosomes, at either the centred or the off-centred positions<sup>37</sup>, or between PRC2 and the free  
266 DNA (Fig. 4b). In agreement with a previous work<sup>38</sup>, the PRC2 core complex exhibited moderate  
267 affinity for mononucleosomes ( $K_d = 330 \pm 30$  nM). Remarkably, the PRC2<sub>PIR-long</sub> construct increased  
268 the affinity of PRC2 to nucleosomes by >15-fold ( $K_d = 19.0 \pm 0.6$  nM) compared to the PRC2 core  
269 complex (Supplementary Fig. 4b, c).

270           To determine if PALI1 enhances substrate binding in a mechanism linked to allosteric  
271 activation, we quantified the affinity of the PRC2 core complex to nucleosomes after pre-incubation  
272 with a PALI1-K1241me3 peptide (Fig. 4b and Supplementary Fig. 4b, c). The PALI1-K1241me3 peptide  
273 did not increase the affinity of the PRC2 core to nucleosomes (Supplementary Fig. 4b, c), thus  
274 suggesting that PALI1 facilitates an allosteric activation and substrate binding by independent  
275 mechanisms. Accordingly, the PRC2-PALI1<sub>PIR-long</sub> K1241A mutant, which is defective in the allosteric  
276 activation (Fig. 2a), binds nucleosomes with a similar affinity to the wild type PRC2-PALI1<sub>PIR-long</sub> (< 2-  
277 fold  $K_d$ ) (Fig. 4b and Supplementary Fig. 4b, c). Collectively, these results indicate that the PRC2-  
278 binding domain of PALI1 facilitates DNA and substrate binding in addition to—and independent of—  
279 allosteric activation.

280 **Overexpression of wild type PALI1 triggers cell differentiation in chronic myeloid leukaemia cells,**  
281 **with the phenotype abrogated by an allosteric-defective mutant.**

282 One paper reported a large increment of global H3K27me3 in HeLa cells after C10ORF12  
283 overexpression<sup>33</sup>. Yet, we did not detect a significant change of global H3K27me3 while  
284 overexpressing PALI1 in K562 (Supplementary Fig. 5a), HEK293T (Supplementary Fig. 5b, left) and  
285 HeLa (Supplementary Fig. 5b, right) cells. Little is known about the cellular function of PALI1, but our  
286 data thus far indicates a resemblance to JARID2 at the molecular level. JARID2 is frequently deleted  
287 in the leukemic transformation of chronic myeloid malignancies<sup>39</sup>. Accordingly, the overexpression  
288 of JARID2 leads to reduced proliferation in leukaemia cell lines and it has been proposed to serve as  
289 a tumour suppressor in leukaemia<sup>40</sup>. Given the functional resemblance with JARID2, we wished to  
290 determine if PALI1 has a negative effect on the proliferation of leukaemia cells. Indeed, competitive  
291 proliferation assay indicated that the overexpression of PALI1, but not the negative control LacZ, in a

292 human chronic myeloid leukaemia cell line (K562) leads to a strong reduction in cell proliferation  
293 (Fig. 5a, b).

294 In addition to reduced proliferation, we noticed that the overexpression of PALI1 in K562  
295 cells, but not the negative control LacZ, led to the pelleted cells becoming red in colour (Fig. 5c). This  
296 observation suggested differentiation along the erythroid lineage<sup>41</sup>, in accord with the reduced cell  
297 proliferation (Fig. 5a, b). We therefore set out to detect the erythroid differentiation marker  
298 CD235a, which increases during erythropoiesis<sup>42</sup>, and the erythroid precursor marker CD71 that is  
299 lost in mature erythrocytes<sup>43</sup> (see illustration at Fig 5e). Indeed, the overexpression of PALI1, but not  
300 LacZ, led to increased expression of CD235a and reduction of CD71, in accord with differentiation  
301 along the erythroid lineage (Fig. 5d, e and Supplementary Fig. 5c, d).

302 We next assayed the PALI1 K1241A separation-of-function mutant, which is defective in  
303 allosteric activation (Fig. 2) and active in DNA binding (Fig. 4b and Supplementary Fig. 4b, c). The  
304 level of CD235a expression and red colour of the cells was comparable either if the PALI1 wild type  
305 or K1241A mutant was expressed (Fig 5c, d), and both the mutant and the wild type PALI1  
306 significantly reduced K562 cell proliferation (Fig 5b). Yet, cells expressing the PALI1 K1241A mutant  
307 proliferated faster than cells expressing the wild type protein (Fig. 5b) and did not exhibit reduction  
308 of the CD71 erythroid precursor marker, similar to cells expressing the LacZ negative control (Fig. 5c,  
309 d and Supplementary Fig. 5c, d). These observations indicate that overexpression of PALI1 triggers  
310 K562 cell differentiation along the erythroid lineage, with the phenotype impaired in the K1241A  
311 mutant (Fig. 5e). These data, together with the data above (Fig. 1-4), imply a mechanistic  
312 resemblance between JARID2 to PALI1 at the molecular level, with a key role for PALI1 K1241 in  
313 allosterically activating PRC2.

314

315

## 316 **DISCUSSION**

317 Our data indicate that the PRC2-interacting domain of PALI1 is sufficient to enhance the HMTase  
318 activity of PRC2 by two independent mechanisms: (i) allosteric activation of catalysis (Fig. 2) and (ii)  
319 DNA binding (Fig. 4). Hence, as little as 193 amino acids in PALI1 (1058-1250) are sufficient to bind  
320 PRC2, bind DNA and stimulate methyltransferase, with the other >1500 amino acids in PALI1 likely  
321 available to engage in other tasks.

322

## 323 **A convergent evolution between PALI1 and JARID2**

324 The nucleation of H3K27me3 *de novo* takes place when transcription programs are changed  
325 during cell differentiation and newly repressed genes acquire the H3K27me3 mark. In the context of  
326 the PRC2.2, JARID2 facilitates the nucleation of H3K27me3<sup>24</sup>, aided by its chromatin binding  
327 activity<sup>19,20,44</sup> and its ability to allosterically stimulate PRC2<sup>21</sup>. In the context of PRC2.1, MTF2  
328 functions in the nucleation of H3K27me3<sup>24</sup>, with a proposed contribution to its DNA-binding  
329 activity<sup>45,46</sup>. Although MTF2 does not allosterically stimulate PRC2, it coexists in the PRC2.1 complex  
330 with PALI1<sup>16,18,25</sup>. Through the discovery that PALI1 allosterically activates PRC2 (Fig. 2-3) and  
331 facilitates substrate binding (Fig. 4), we reveal a striking functional resemblance between PALI1 to  
332 JARID2: (i) Both PALI1 and JARID2 bind to nucleosomes: the former likely with the aid of its DNA  
333 binding activity (Fig. 4) and the latter through interactions with H2AK119-ubiquitinated  
334 chromatin<sup>19,20</sup>. (ii) JARID2 comprises the PRC2.2 complex together with the chromatin-binding  
335 subunit AEBP2 while PALI1 binds to the PRC2.1 complex together with a polycomb-like DNA binding  
336 subunit (PHF1, MTF2 or PHF19)<sup>16,18,25</sup>. (iii) PRC2 methylates PALI1 and JARID2, with the di- or tri-  
337 lysine then binds to EED for allosteric activation of PRC2 (Fig. 2-3 and <sup>21</sup>). (iv) For their interactions  
338 with EED, both PALI1 and JARID2 using an aromatic residue, located at the +1 position with respect  
339 to the methylated lysine (Fig. 3c). The importance of the +1 adjacent aromatic residue supported by  
340 the JARID2 F117A mutation that prevented both EED binding and the stimulation of PRC2<sup>21</sup>.

341 Strictly, despite these mechanistic and structural similarities, PALI1 and JARID2 have no  
342 common ancestor: PALI1 is a vertebrate-specific protein<sup>18</sup> and JARID2 is conserved in fly and human  
343 (Fig. 3d). Therefore, we propose that PALI1 has emerged in vertebrates as the result of convergent  
344 evolution, under a selection pressure to mimic some of the molecular functions of JARID2 within the  
345 context of the PRC2.1 complex.

## 346 **PALI1 provides PRC2 with means to gauge its own enzymatic activity before adding a stimulus**

347 EZH2 automethylation is proposed to modulate the HMTase activity of PRC2 in response to  
348 molecular cues, including the presence of histone H3 tails and SAM concentration<sup>31</sup>. A similar  
349 principle might apply for PALI1. Future studies are still needed in order to identify whether PALI1  
350 (and JARID2) are methylated in cis or by another PRC2 complex and if the degree of methylation  
351 changes during normal development or in cancer and other pathologies. Yet, our analysis indicates  
352 that PRC2 has the capacity to methylate PALI1 (Fig 1b, c) and implies that the degree of PALI1 K1241  
353 methylation varies between cell lines (Fig. 1a). Given these observations, it is plausible that PALI1  
354 provides PRC2 with means to gauge its own enzymatic activity before applying an additional  
355 stimulus.

356 **PAL11 as a potential bridge between the H3K27me3 and H3K9me2 repressive marks**

357 Amino acids in regions of PAL11 dispensable for the regulation of PRC2 bind to the H3K9-  
358 methyltransferase G9a<sup>18</sup>. PRC2 and G9a share a portion of their genomic targets<sup>47</sup> and are physically  
359 associated<sup>47,48</sup>. In ES cells, G9a contributes to H3K27 methylation *in vivo*, with the global  
360 H3K27me1—but not H3K27me2/3—reduced upon knockout of G9a<sup>49</sup>. Affinity purification mass  
361 spectrometry (AP-MS) with either C10ORF12<sup>25</sup> or PAL11<sup>18</sup> used as baits detected the subunits of the  
362 G9a–GLP H3K9me1/2 methyltransferase complex, including G9a, GLP and WIZ. Importantly, the  
363 PRC2-interacting domain of PAL11 is distinct to its G9a-interacting region<sup>18</sup>. Our data indicate that  
364 the PRC2-binding region of PAL11 is sufficient (i) to bind to PRC2 (Fig. 1), (ii) to promote PRC2  
365 nucleosome substrate binding (Fig. 4) and (iii) to trigger an allosteric stimulation of catalysis (Fig. 2):  
366 three prerequisites for the nucleation of H3K27me3 *de novo*<sup>21</sup>. While experiments in cells are  
367 required in order to determine if PAL11 could nucleate both H3K27me3 and H3K9me2 *de novo*  
368 during cell differentiation, it does have the molecular characteristics for that.

369 Recent studies showed that PRC2.1 and PRC2.2 synergise and share most of their target genes<sup>11</sup>,  
370 with their accessory subunits collectively required<sup>12</sup>. While a previous attempt to identify the binding  
371 sites of PAL11 on chromatin using ChIP was reported as unsuccessful<sup>18</sup>, the PRC2.1 complex is  
372 localised at a minority of unique genomic sites, independently of PRC2.2<sup>11</sup>. We measured small  
373 variation between the affinity of the PRC2-PAL1<sub>PIR</sub> complex for the CpG-rich DNA (CpG46  $K_d = 155 \pm$   
374 26 nM) comparing a size-matched DNA lacking CpG sequences (CpG46 mt;  $K_d = 73.7 \pm 10$  nM) (Fig.  
375 4a). It is, therefore, possible that PAL11 could allow for some degree of target-specificity, utilising  
376 some variations in affinities for DNA combined with context-specific chromatin binding. Such  
377 context-specific binding could be attributed to interactions with the G9a complex and the CTBP  
378 proteins binding to the N-terminal domain of PAL11<sup>18</sup>. This model is in agreement with the view that  
379 a combination of factors and interactions are responsible for the recruitment of PRC2 to its target  
380 genes<sup>7</sup>.

381 Collectively, our data indicate that the PRC2-binding domain of PAL11 enhances H3K27-  
382 methyltransferase by two independent mechanisms (Fig. 6): (i) DNA- and substrate-binding and (ii)  
383 allosteric stimulation. The remarkable mechanistic resemblance between PAL11 and JARID2 indicates  
384 convergent evolution for the emergence of mechanisms for the regulation of the PRC2.1 and PRC2.2  
385 complexes, respectively. More broadly, it implies that subunit-induced allosteric activation is an  
386 indispensable property of a holo-PRC2 complex in vertebrates.

387

388 **ACKNOWLEDGMENTS**

389 We would like to thank the Monash Biomedical Proteomics Facility for providing instrumentation  
390 and technical support, Monash FlowCore for sorting of cells and for assistance with flow cytometry  
391 analysis and Monash Molecular Crystallization Facility for initial crystallization screening. This  
392 research was undertaken in part using the MX2 beamline at the Australian Synchrotron, part of  
393 Australia's Nuclear Science and Technology Organisation (ANSTO), and made use of the Australian  
394 Cancer Research Foundation (ACRF) detector. We also thank the support from the MASSIVE HPC  
395 facility ([www.massive.org.au](http://www.massive.org.au)). We thank Ruby Law and her lab members for advice, discussions,  
396 training and assistance with the X-ray crystallography data collection and structure determination.  
397 Q.Z. holds an Australian Research Council (ARC) Discovery Early Career Researcher Award  
398 (DE180100219). S.C.A. is supported through an Australian Government Research Training Program  
399 (RTP) Scholarship. B.M.O. is supported through an Australian Government RTP Scholarship and also  
400 by the Monash Graduate Excellence Scholarship. C.D. is an EMBL-Australia Group Leader and  
401 acknowledges support from the ARC (DP190103407) and the NHMRC (APP1162921 & APP1184637).

402

403 **AUTHOR CONTRIBUTION**

404 Q.Z., S.C.A. and S.F.F. prepared reagents. Q.Z., S.C.A., and B.M.O. developed assays. Q.Z., S.C.A. and  
405 S.F.F. carried out experiments. Q.Z., S.C.A., S.F.F. and V.L. analysed data. Q.Z., S.C.A. and C.D. wrote  
406 the manuscript. Q.Z., S.C.A and C.D. designed the project. C.D. supervised the project.

407

408 **DECLARATION OF INTERESTS**

409 The authors declare no competing interests.

410

411

412

413

414

415

416

## 417 **METHODS**

### 418 **Protein expression and purification**

419 The cloning of constructs for the expression of the full-length sequences encoding for human EZH2,  
420 SUZ12, RBBP4, EED and AEBP2 (UniProtKB: Q15910-2, Q15022-1, Q09028-1, O75530-1 and Q6ZN18-  
421 2, respectively) into a pFastBac1 expression vectors, modified to include either a PreScission-  
422 cleavable N-terminal hexahistidine-MBP tag or TEV-cleavable N-terminal hexahistidine tag, were  
423 previously described<sup>35,50,51</sup>. Full-length PALI1 was assembled and subcloned into the  
424 pFB1.HMBP.A3.PrS.ybbR vector using Gibson Assembly (primers as indicated in Table S2) with gene  
425 synthesised N-terminal fragment (amino acids 1-310) of PALI1 (GeneScript) and commercially  
426 available C10orf12 cDNA clone encoding PALI1 amino acids 311-1557 (Millennium Science  
427 #MHS6278-202756878) as templates (see Supplementary Table 2 for the full-length PALI1 ORF  
428 sequence). The PIR (amino acids 1058-1250) and PIR-long (amino acids 1058-1329) fragments of  
429 PALI1 were subcloned into the pFB1.HMBP.A3.PrS.ybbR vector digested with XmaI and XbaI (NEB),  
430 under a PreScission-cleavable N-terminal hexahistidine-MBP tag, using Gibson Assembly (NEB  
431 #E2611L) with primers as indicated in Supplementary Table 2.

432 Mutations were introduced to plasmids coding for PALI1 and its truncations using Takara PrimeSTAR  
433 HS DNA Polymerase (Clontech #R045A), with primers indicated in Supplementary Table 2.  
434 Baculovirus production, titration, infection, and cell harvesting and the purification of PRC2, PRC2-  
435 PALI1<sub>PIR</sub>, PRC2-PALI1<sub>PIR-long</sub> and their mutants performed as previously described<sup>35</sup>. The expression  
436 and purification of PRC2 in complexes with MBP-fused PALI1 truncations, PRC2-[MBP-PALI1<sub>PIR</sub>] and  
437 PRC2-[MBP-PALI1<sub>PIR-long</sub>] performed as above, with the exception that PRC2 core subunits were  
438 expressed under TEV-cleavable hexahistidine-tag and PALI1 truncations under PreScission-cleavable  
439 N-terminal hexahistidine-MBP tag. During the purification of these constructs, only TEV used to cleave  
440 tags selectively from the PRC2 core subunits, with the MBP tag on the PALI1 construct remained  
441 intact. All the complexes were snap-frozen in liquid nitrogen and stored at -80 °C as single-use  
442 aliquots.

443 For the structure-function study of EED, two fragments of human EED (amino acids 40-441 and 76-  
444 441) were subcloned into a pGEX-MHL expression vector with a TEV-cleavable N-terminal GST-tag (a  
445 gift from the lab of Asst. Prof. Yufeng Tong, University of Windsor) using primers as in  
446 Supplementary Table 2. The recombinant proteins were overexpressed in *E.coli* BL21 (DE3) at 17 °C  
447 overnight and then purified by Glutathione-agarose (Sigma #G4510). Briefly, harvested cells were  
448 resuspended in an ice-cold lysis buffer (20 mM Tris-HCl pH 7.5 at 25 °C, 250 mM NaCl, 1 mM  
449 phenylmethylsulfonyl fluoride (PMSF) and 1 mM DTT) and lysed using sonication. The cleared lysate

450 was batch-bound to Glutathione-agarose and washed using ice-cold 10 column volumes (c.v.) of lysis  
451 buffer before proteins were eluted using ice-cold elution buffer (20 mM Tris-HCl pH 7.5 at 25 °C, 150  
452 mM NaCl, 10 mM reduced glutathione). Tag cleaved using TEV, overnight at 4 °C. The protein was  
453 subsequently purified by heparin HP column (GE #17040701), using a buffer containing 20 mM Tris-  
454 HCl pH 7.5 at 4 °C and a 150 mM to 2000 mM NaCl gradient. Gel filtration purification carried out  
455 using HiLoad 16/600 Superdex 200 size exclusion column (GE #28-9893-35), using a buffer containing  
456 20 mM HEPES pH 7.5 and 150 mM NaCl. The peak fractions were pooled, concentrated to a buffer  
457 containing 20 mM HEPES pH 7.5, 150 mM NaCl, 1 mM Tris(2-carboxyethyl)phosphine (TCEP), and  
458 snapped-frozen as single-use aliquots.

#### 459 **Nucleosome reconstitution**

460 Recombinant human histones were purified from inclusion bodies and reconstituted into histone  
461 octamers as previously described<sup>52</sup>. For the generation of mononucleosomes, unlabelled or Cy5  
462 labelled 182-base-pair DNA including one copy of the 601 Widom sequence was PCR amplified as  
463 previously described<sup>35</sup>. DNA was purified via HiTrap Q HP column (GE #17-1154-01) with 10 c.v.  
464 gradient starting with buffer A (20 mM Tris-HCl, pH 7.5 at 25 °C, 150 mM NaCl) into 50 % buffer B (20  
465 mM Tris-HCl, pH 7.5 at 25 °C, 2 M NaCl). The peak fractions were pooled, DNA was concentrated by  
466 ethanol precipitation and was then dissolved in TE buffer. Mononucleosomes were reconstituted  
467 using the salt dialysis method<sup>52</sup>. Reconstituted mononucleosomes were dialyzed against a buffer  
468 consisting of 20 mM Tris-HCl pH 7.5 (at 25 °C), 25 mM KCl, 1 mM EDTA and 1 mM DTT and  
469 concentrated with Amicon Ultra-0.5 mL centrifugal filter (Merck #UFC503096). Nucleosomes were  
470 stored in 4 °C and the quality of nucleosomes was assessed by 5-6 % TBE gel.

#### 471 ***In vitro* HMTase activity assays using radiolabelled S-adenosyl-l-methionine**

472 HMTase activity assays were performed as previously described<sup>35</sup>, with some modifications. In brief,  
473 each 10 µL HMTase reaction contained 500 nM PRC2, 2 µM mononucleosomes and 5.0 µM S-  
474 [methyl-14C]-adenosyl-l-methionine (PerkinElmer, #NEC363050UC) in the presence or absence of  
475 stimulatory or control peptides in concentrations as indicated in the text. For HMTase assays in the  
476 presence or absence of the PRC2 allosteric inhibitor A395 or the negative control A395N, PRC2  
477 concentration was adjusted to 200 nM and the concentration of other reagents remained the same.  
478 For HMTase assays carried out for the identification of PALI1 methylations with the aid of 3C  
479 protease, 800 ng protease per reaction was added. All the reactions were incubated for 1 h at 30 °C  
480 in buffer containing 50 mM Tris-HCl pH 8.0 at 30 °C, 100 mM KCl, 2.5 mM MgCl<sub>2</sub>, 0.1 mM ZnCl<sub>2</sub>, 2  
481 mM 2-mercaptoethanol, 0.1 mg/ml BSA (NEB #B9000) and 5% v/v glycerol. The reactions were then  
482 stopped by adding 4× LDS sample buffer (Thermo Fisher Scientific, #NP0007) to a final concentration

483 of 1×. Samples were then heated at 95 °C for 5 min prior to being subjected to 16.5 % SDS-PAGE.  
484 Gels were stained with InstantBlue Coomassie protein stain (Expedeon, #ISB1L) before vacuum-  
485 drying for 1 h at 80 °C. Dried gels were then exposed to a storage phosphor screen (GE Healthcare)  
486 for 1-7 days before acquiring radiograms using Typhoon 5 Imager (GE Healthcare). Densitometry was  
487 carried out using ImageJ<sup>53</sup>. All experiments were performed in triplicate.

#### 488 **Liquid chromatography with tandem mass spectrometry (LC-MS/MS) and MS/MS data analysis**

489 For the identification of methylations in the recombinant PRC2-PALI1<sub>PIR-long</sub> complex, 0.5 μM protein  
490 was incubated in the presence or absence of 20 μM SAM (NEB #B9003) in 25 mM HEPES pH 8.0, 50  
491 mM NaCl, 2 mM MgCl<sub>2</sub>, 2 mM 2-mercaptoethanol and 10 % glycerol for 1 hour at 30 °C, in a total  
492 final volume of 85 μL. The proteins were then alkylated, subjected to tryptic digestion and the tryptic  
493 peptides were treated and analysed by MS/MS as previously described<sup>35</sup>. Methylated residues  
494 were identified using MaxQuant<sup>54</sup> by searching against a database containing the protein subunits of  
495 the PRC2-PALI1<sub>PIR-long</sub> complex.

496 Publicly available A/IP-MS data (identifiers: PXD004462<sup>27</sup>, PXD012547<sup>28</sup>, PXD013390<sup>29</sup>, PXD012354<sup>26</sup>,  
497 and PXD003758<sup>15</sup>) were downloaded from ProteomeXchange and used to identify methylations of  
498 PRC2 subunits. Methylated residues were identified using MaxQuant<sup>54</sup> by searching against a  
499 database containing the human or mouse proteome from Uniprot (Proteome ID UP000005640 or  
500 UP00000589, respectively), with the sequences for human or mouse PALI1 and PALI2 appended to  
501 them (Uniprot identifiers: Q96JN0-3, A0A1B0GVP4, A0A571BF12 and A0A571BEC4). The amino acid  
502 numbering of methylated amino acids throughout the text and figures are based on the human  
503 numbering, with the mouse amino acids numbers converted to human numbers for compatibility,  
504 based on pairwise sequence alignment<sup>55</sup>.

#### 505 **Crystallization and structure determination**

506 Purified EED (amino acids 76-441) protein at 1.5-2.0 mg/mL was mixed with PALI1 peptides at 1:5  
507 EED:PALI1-peptide molar ratio and the mixture were incubated at 4 °C for 1 h before subjected to  
508 crystallization trials. Crystals were grown using the vapour diffusion method in a buffer containing  
509 3.5-3.9 M sodium formate, 10 mM TCEP and 5% glycerol. Crystals were soaked in a reservoir solution  
510 with 10-20% glycerol before flash-freezing in liquid nitrogen.

511 X-ray diffraction data were collected at MX2 beamline of the Australian Synchrotron<sup>56</sup>. All structures  
512 were determined by molecular replacement using PHASER<sup>57,58</sup>, using EED-H3K27me3 structures<sup>23,59</sup>  
513 as the search model (PDB: 3JZG<sup>59</sup> and 3IIW<sup>23</sup>). REFMAC5<sup>60</sup> and PHENIX<sup>61</sup> were used for refinement  
514 and Coot<sup>62</sup> was used for manual structure building and visualization. Figures were generated with



515 PyMOL (The PyMOL Molecular Graphics System, Version 2.0 Schrödinger, LLC.). Crystal diffraction  
516 data, refinement statistics and PDB accessions for these structures are in Table 1.

#### 517 **DNA binding assays using fluorescence anisotropy**

518 3'-fluorescein-labelled CpG46 and CpG46 mt DNAs were synthesized by Integrated DNA  
519 Technologies, Inc. The CpG46 DNA probe was destined to form a hairpin including a 46 bases long  
520 double-stranded DNA with a nucleotide sequence originating from a CpG island of the human  
521 CDKN2B PRC2-target gene, with this sequence mutated in CpG46 mt DNA to remove the CpG  
522 sequences and reduce the GC content.

523

524 CpG46 sequence:

525 5'GGCGCCCTGCCCCGCTCGCTCTGGCAGAGTGGGGAGCCAGCCGGCGCTAGCCGGTGGCTCCCCACTCTG  
526 CCAGAGCGAGGCGGGGCAGGGCGCC

527

528 CpG46 mt sequence:

529 5'AATATTTCAATTTATTCTATCTCAATGAGACAAAAGATTGATTAATGCTAATTAATCAATCTTTGTCTCATTG  
530 AGATAGAATAAAATGAAATATT

531

532 DNA was incubated for 2 min at 95 °C in 10 mM Tris-HCl pH 7.5 (at 25 °C) and was immediately snap-  
533 cooled on ice for 2 min. Next, DNA was allowed to fold at 37 °C for 30 min in binding buffer (50 mM  
534 Tris-HCl pH7.5 at 25 °C, 100 mM KCl, 2 mM 2-mercaptoethanol, 0.1 mg/mL BSA, 0.05 % NP-40). Two-  
535 fold serial dilutions of protein were made into a binding buffer and were added into the  
536 fluorescently-labelled DNA probe. The DNA probe concentration was 5 nM for each 40 µL reaction  
537 volume and the mixtures were equilibrated at 30 °C for 30 min before measurement. Fluorescence  
538 anisotropy data were collected using a PHERAstar plate reader (BMG Labtech) at 30 °C. The  
539 background was subtracted from protein-free samples. Data were fitted with GraphPad Prism 8  
540 software using non-linear regression for specific binding with a Hill slope function. All experiments  
541 were performed in triplicates that were carried out on different days.

#### 542 **RNA binding assays using fluorescence anisotropy**

543 The RNA-binding affinities of proteins were quantified using fluorescence anisotropy. Experiments  
544 were carried out as we previously described<sup>35</sup>. Briefly, a 3' fluorescein-labelled G4 24 RNA with the  
545 sequence (UUAGGG)<sub>4</sub> was used and the reaction took place as above, with the exception that the  
546 initial incubation at 95 °C was limited to 1 min and the binding buffer was 50 mM Tris-HCl pH7.5 at

547 25 °C, 200 mM KCl, 2.5 mM MgCl<sub>2</sub>, 0.1 mM ZnCl<sub>2</sub>, 2 mM 2-mercaptoethanol, 0.1 mg/mL BSA, 0.05%  
548 NP-40 and 0.1 mg/mL fragmented yeast tRNA (Sigma, #R5636).

#### 549 **Peptide binding assays using fluorescence anisotropy**

550 For assaying the affinity of the JARID2-K116me3 peptide for EED, various concentrations of EED  
551 (amino acids 40-441) were incubated with 40 nM of 5-FAM labelled JARID2-K116me3 peptide in  
552 binding buffer (50 mM Tris-HCl pH 7.5 at 25 °C, 100 mM KCl, 2 mM 2-mercaptoethanol, 0.1 mg/mL  
553 BSA, 0.05 % NP-40, 2.5% glycerol) at 30 °C for 30 min before a fluorescence anisotropy measurement  
554 took place using a PHERAstar plate reader. Data processing was carried out as previously  
555 described<sup>63</sup>, with some modifications. Specifically, with changing the concentration of EED protein  
556 (P), we recorded  $\Delta R_{obs}$ : the observable anisotropy of the mixtures after the subtraction of the  
557 observable anisotropy of the 5-FAM labelled JARID2-K116me3 peptide ligand. Data were fitted to  
558 equation (1), below, by using nonlinear least-squares fit (Matlab, MathWorks) to estimate the  
559 anisotropy difference  $\Delta r$  and the dissociation constant between the protein EED to the ligand  
560 JARID2-K116me3 peptide,  $K_L$ :

561

$$562 \quad (1) \quad \Delta R_{obs} = \frac{\Delta r [PL]}{[PL] + [L]}$$

563

564 where the concentrations of the protein-ligand complex [PL] and the free ligand [L] are calculated  
565 from equations (2) and (3) below, respectively, with P<sub>0</sub> and L<sub>0</sub> indicates the total concentration of the  
566 protein and the ligand, respectively.

567

$$568 \quad (2) \quad [PL] = \frac{(K_L + [P_0] + [L_0]) - \sqrt{(K_L + [P_0] + [L_0])^2 - 4[P_0][L_0]}}{2}$$

569

$$570 \quad (3) \quad [L] = [L_0] - [PL]$$

571

572 Fluorescence anisotropy displacement titrations were used to assay the dissociation constants of the  
573 unlabelled peptides (N) and the protein (P). Assays were carried out as described above, with the  
574 exception that two-fold serial dilutions of unlabelled peptides were combined with EED at a final  
575 concentration of 10 μM and 5-FAM labelled JARID2-116me3 peptide at a final concentration of 40  
576 nM before anisotropy data were collected as described above. Data processing was carried out as  
577 previously described<sup>63</sup>. Specifically,  $\Delta R_{obs}$  were recorded for each peptide [N] concentration point  
578 and equation (1) used to estimate  $K_N$  and  $\Delta r$  as the fitting parameters.  $K_N$  is the equilibrium

579 dissociation constant for binding of the unlabelled peptide N to the protein P.  $N_0$  is the total  
580 concentration of N.  $[PL]$  and  $[L]$  are calculated in a different way:

$$581 \quad [PL] = \frac{[L_0][P]}{K_L + [P]}$$

582  
583 and  $[L] = [L_0] - [PL]$

584 where  $K_L$  are obtained from the measurement above, and  $[P]$  is one of the roots of the cubic  
585 equation:

$$586 \quad [P]^3 + c_2[P]^2 + c_1[P] + c_0 = 0$$

587 where

$$588 \quad c_2 = K_L + K_N + [N_0] + [L_0] - [P_0]$$
$$589 \quad c_1 = K_L K_N - K_N [P_0] + K_L [N_0] - K_L [P_0]$$
$$590 \quad c_0 = -K_L K_N [P_0]$$

591

#### 592 **Electrophoretic mobility shift assay (EMSA)**

593  
594  
595 Cy5 labelled nucleosomes were diluted using binding buffer (50 mM Tris-HCl, pH7.5 at 25 °C, 100  
596 mM KCl, 2 mM 2-mercaptoethanol, 0.05 % v/v NP-40, 0.1 mg/mL BSA, 5 % glycerol). Two-fold serial  
597 dilutions of protein in binding buffer were combined with nucleosome probes, to a final probe  
598 concentration of 5 nM. The reaction mixtures were incubated at 4 °C for 30 min and then subjected  
599 to non-denaturing gel electrophoresis at 6.6 V/cm over a 0.7 % agarose gel buffered with 1 × TBE at  
600 4 °C for 1 h. Gels were imaged using Typhoon 5 Imager (GE Healthcare) to record signals from the  
601 Cy5 dye. The fractions of bound nucleosomes were calculated based on the unbound nucleosomes  
602 band, with the densitometry analysis carried out using ImageJ<sup>53</sup>. Data were fitted with GraphPad  
603 Prism 8 software using non-linear regression for specific binding with Hill slope function. All  
604 experiments were performed in triplicate.

#### 605 **Cell culture**

606 K562 cells were cultured in RPMI-1640 (Merck #R8758) growth medium and HEK293T and HeLa were  
607 cultured in DMEM growth medium. In all cases, growth media were supplemented with 10 % FBS  
608 (Cellsera AU-FBS/SF) and 1 % (v/v) penicillin-streptomycin (Thermo Scientific #15140122) and  
609 incubated at 37°C with 5% CO<sub>2</sub>. K562 and HeLa cells were acquired from ATCC and cells were tested  
610 periodically for mycoplasma contamination.

## 611 **Plasmid transfection, generation of lentiviruses and lentiviral transduction**

612 Flag-PAL1 WT and K1241A mutant, and Flag-LacZ (ORF originated from Addgene #25893), were  
613 subcloned into Smal (NEB #R0141) linearized pHIV-EGFP (Addgene #21373) or pHIV-dTomato  
614 (Addgene #21374) vectors using Gibson Assembly (see Table S2 for primers) and NEB stable  
615 Competent *E. coli* (NEB #C3040). For plasmid transfection, approximately  $10^6$  HEK293T or HeLa cells  
616 were seeded in a 6 well plate. The following day, the medium was replaced with 2 ml of antibiotic-  
617 free DMEM. The transfection mixture for HEK293T cells was created by adding 9  $\mu$ L Lipofectamine™  
618 LTX Reagent with 3  $\mu$ L PLUS™ Reagent (Thermo Scientific #15338100) and 3  $\mu$ g of a plasmid to 500  
619  $\mu$ L Opti-MEM™ (Thermo Scientific #31985062). The transfection mixture for HeLa cells instead  
620 consisted of 6  $\mu$ L Lipofectamine™ LTX Reagent with 3  $\mu$ L PLUS™ Reagent and 1.25  $\mu$ g of transfer  
621 plasmid in 500  $\mu$ L Opti-MEM™ (Thermo Scientific #31985062). The transfection mixture was  
622 incubated at room temperature for 25 minutes and then added to the cells before returning them to  
623 the incubator. The growth medium was replaced after 24 hours. For cell harvesting ahead of  
624 immunoblotting, 48 hours after transfection the media was removed and replaced with 350  $\mu$ L of  
625 Laemmli buffer (1 % (v/v) SDS, 12.5 % (v/v) glycerol, 35 mM Tris pH 7.5 at 25 °C, 0.01 % (w/v)  
626 bromophenol blue, 5 mM MgCl<sub>2</sub>, 1 % (v/v) 2-mercaptoethanol) and 25 U/mL Benzonase (Merck  
627 #70746).

628 For the generation of lentiviruses, HEK293T cells were transfected as above, with 0.5  $\mu$ g pMD2.G  
629 plasmid, 1  $\mu$ g psPAX2 plasmid and 1.5  $\mu$ g of transfer plasmid. After 48 and 72 hours, the culture  
630 supernatant containing the lentivirus was collected and stored at -80 °C. For lentiviral transduction,  
631 200  $\mu$ L of lentiviral supernatant was added to  $3 \times 10^4$  K562 cells to a final volume of 500  $\mu$ L, with  
632 polybrene at a final concentration of 8  $\mu$ g/mL.

## 633 **Immunoblotting**

634 For nuclear fractionation of K562 cells, cells were washed twice with phosphate-buffered saline  
635 (PBS) by centrifugation at 500 g for 5 minutes then resuspended in cytoplasmic extraction buffer (20  
636 mM Tris pH 7.5 at 25 °C, 0.1 mM EDTA, 2 mM MgCl<sub>2</sub>, 20 mM BME and protease inhibitor cocktail  
637 (Sigma #4693132001)) to a density of  $2 \times 10^7$  cells/mL. The cells were incubated for 2 minutes at room  
638 temperature then 10 minutes on ice before adding NP-40 to a concentration of 1% (v/v) and mixing.  
639 Samples were centrifuged at 4 °C and 500 g for 3 minutes and the supernatant was kept as the  
640 cytoplasmic fraction. The nuclear fraction was washed in cytoplasmic extraction buffer with 1% (v/v)  
641 NP-40 twice, by centrifugation at 4 °C at 500 g for 3 minutes, and was then resuspended in Laemmli  
642 buffer.

643 Samples contain 50 µg total protein were loaded on a 10 % or 16.5 % acrylamide gel for SDS-PAGE  
644 and then transferred to a nitrocellulose membrane (GE Life Sciences #10600002). Membranes were  
645 incubated in blocking buffer (Thermo Scientific #37539) for 1 hour at room temperature before  
646 applying antibodies. Signal was developed using SuperSignal™ West Pico PLUS Chemiluminescent  
647 Substrate (Thermo Scientific #34580) and images were taken on a ChemiDoc™ imager. All  
648 experiments were performed in triplicates.

649 The antibodies used for immunoblotting include: anti-Flag HRP-conjugated (Sigma #A8592, 1:1000),  
650 anti-LCOR (Merck #ABE1367, 1:250), anti-actin (Sigma #A2066, 1:800), anti-EZH2 (Active Motif  
651 #39875, 1:10000), anti-H3 (Abcam #Ab1791, 1:100000), anti-H3K27me3 (Merck #07-449, 1:25000),  
652 anti-mouse HRP-conjugated (Jackson Immuno-Research #715-035-150, 1:5000), anti-rabbit HRP-  
653 conjugated (Santa Cruz Biotechnology #sc-2357, 1:5000).

#### 654 **Competitive cell proliferation assay**

655 Cells were transduced with lentiviruses carrying the specified gene constructs and were then  
656 cultured, each sample separately, for 7 days. At this point, an equal number of eGFP or dTomato  
657 positive cells were sorted using flow cytometry, as described below, and combined into the same  
658 collection tube and placed in the same well for the competition experiment. Cells of the two  
659 competing treatments were cultured together in the same well for 7 days. Next, the number of  
660 eGFP- and dTomato-expressing cells counted using flow cytometry with the B530-A and YG586-A  
661 detectors, respectively. Three independent biological replicates, starting from lentivirus  
662 transduction, were initiated on three different days and were carried out as described above.

#### 663 **Detection of eGFP and dTomato using Flow cytometry**

664 Before sorting or analysis by flow cytometry, cells were centrifuged at 500 g for 5 minutes, and the  
665 supernatant removed. The cells were then resuspended in flow cytometry buffer (PBS supplemented  
666 with 10 % FBS and 615 µM EDTA) to a density of approximately  $10^7$  cells/mL, ran through a cell  
667 strainer (Falcon 352235) and kept on ice. For the detection of GFP or dTomato, the cells were sorted  
668 by flow cytometry on a BD Influx™ cell sorter using the 488 nm or the 561 nm lasers, respectively.  
669 For the selection of transduced cells, gates for sorting were set to include the top 10 or 20 % of the  
670 GFP or dTomato positive cells in the samples transduced with PALI1 wild type, based on the first  
671 replicate. For the analysis of transduced cells, approximately  $0.5-1.0 \times 10^5$  intact single cells were  
672 analysed on a BD LSRFortessa™ X-20 analyser, with the threshold for GFP or dTomato positive cells  
673 was defined based on the intensity observed at the top 0.1 % of untransduced K562 cells. Data were  
674 analysed using BD FACSDiva™ and GraphPad Prism.

## 675 **Detection of CD235a or CD71 using Flow Cytometry**

676 Cells were transduced with lentiviruses carrying the specified gene constructs and were then  
677 cultured for 7 days. Cells were sorted for high GFP expression, as described above, and then cultured  
678 for 7 additional days before the growth medium was removed by spinning the cells at 500 g for 5  
679 minutes. Cells at a density of  $2 \times 10^7$  cells/mL were incubated for 1 hour in flow cytometry buffer with  
680 5  $\mu$ L of Pacific Blue™ conjugated anti-CD235a antibody (BioLegend #349108) and 4  $\mu$ g of  
681 unconjugated mouse IgG2a (Merck #M5409) per 100  $\mu$ L for detection of CD235a, or 2.5  $\mu$ L of  
682 Brilliant Violet 421™ conjugated anti-CD71 antibody (Biolegend #113813) per 100  $\mu$ L for the  
683 detection of CD71. The cells were centrifuged again at 500 g for 5 minutes and the supernatant  
684 removed, then washed with antibody-free flow cytometry buffer. The cells were then analysed by  
685 flow cytometry for the quantification of CD235a in the GFP positive cells using the V450-A and B530-  
686 A detectors, respectively. Three independent biological replicates, starting from lentivirus  
687 transduction, were initiated on three different days and were carried out as described above. The  
688 data was analysed using FlowJo and GraphPad Prism.

689

690

## 691 **REFERENCES**

- 692 1. Holland, L.Z. et al. The amphioxus genome illuminates vertebrate origins and cephalochordate  
693 biology. *Genome Res* **18**, 1100-11 (2008).
- 694 2. Prachumwat, A. & Li, W.H. Gene number expansion and contraction in vertebrate genomes  
695 with respect to invertebrate genomes. *Genome Res* **18**, 221-32 (2008).
- 696 3. Larroux, C. et al. Genesis and expansion of metazoan transcription factor gene classes. *Mol*  
697 *Biol Evol* **25**, 980-96 (2008).
- 698 4. Shilatifard, A. The COMPASS family of histone H3K4 methylases: mechanisms of regulation in  
699 development and disease pathogenesis. *Annu Rev Biochem* **81**, 65-95 (2012).
- 700 5. Scheuermann, J.C., Gutierrez, L. & Muller, J. Histone H2A monoubiquitination and Polycomb  
701 repression: the missing pieces of the puzzle. *Fly (Austin)* **6**, 162-8 (2012).
- 702 6. Schuettengruber, B., Bourbon, H.M., Di Croce, L. & Cavalli, G. Genome Regulation by Polycomb  
703 and Trithorax: 70 Years and Counting. *Cell* **171**, 34-57 (2017).
- 704 7. Margueron, R. & Reinberg, D. The Polycomb complex PRC2 and its mark in life. *Nature* **469**,  
705 343-9 (2011).
- 706 8. Yu, J.R., Lee, C.H., Oksuz, O., Stafford, J.M. & Reinberg, D. PRC2 is high maintenance. *Genes*  
707 *Dev* **33**, 903-935 (2019).
- 708 9. Laugesen, A., Hojfeldt, J.W. & Helin, K. Molecular Mechanisms Directing PRC2 Recruitment  
709 and H3K27 Methylation. *Mol Cell* **74**, 8-18 (2019).
- 710 10. Deevy, O. & Bracken, A.P. PRC2 functions in development and congenital disorders.  
711 *Development* **146**(2019).
- 712 11. Healy, E. et al. PRC2.1 and PRC2.2 Synergize to Coordinate H3K27 Trimethylation. *Mol Cell* **76**,  
713 437-452 e6 (2019).

- 714 12. Hojfeldt, J.W. et al. Non-core Subunits of the PRC2 Complex Are Collectively Required for Its  
715 Target-Site Specificity. *Mol Cell* **76**, 423-436 e3 (2019).
- 716 13. Beringer, M. et al. EPOP Functionally Links Elongin and Polycomb in Pluripotent Stem Cells.  
717 *Mol Cell* **64**, 645-658 (2016).
- 718 14. Zhang, Z. et al. PRC2 complexes with JARID2, MTF2, and esPRC2p48 in ES cells to modulate ES  
719 cell pluripotency and somatic cell reprogramming. *Stem Cells* **29**, 229-40 (2011).
- 720 15. Kloet, S.L. et al. The dynamic interactome and genomic targets of Polycomb complexes during  
721 stem-cell differentiation. *Nat Struct Mol Biol* **23**, 682-690 (2016).
- 722 16. Hauri, S. et al. A High-Density Map for Navigating the Human Polycomb Complexome. *Cell Rep*  
723 **17**, 583-595 (2016).
- 724 17. Smits, A.H., Jansen, P.W., Poser, I., Hyman, A.A. & Vermeulen, M. Stoichiometry of chromatin-  
725 associated protein complexes revealed by label-free quantitative mass spectrometry-based  
726 proteomics. *Nucleic Acids Res* **41**, e28 (2013).
- 727 18. Conway, E. et al. A Family of Vertebrate-Specific Polycombs Encoded by the LCOR/LCORL  
728 Genes Balance PRC2 Subtype Activities. *Mol Cell* **70**, 408-421 e8 (2018).
- 729 19. Cooper, S. et al. Jarid2 binds mono-ubiquitylated H2A lysine 119 to mediate crosstalk between  
730 Polycomb complexes PRC1 and PRC2. *Nat Commun* **7**, 13661 (2016).
- 731 20. Kalb, R. et al. Histone H2A monoubiquitination promotes histone H3 methylation in Polycomb  
732 repression. *Nat Struct Mol Biol* **21**, 569-71 (2014).
- 733 21. Sanulli, S. et al. Jarid2 Methylation via the PRC2 Complex Regulates H3K27me3 Deposition  
734 during Cell Differentiation. *Mol Cell* **57**, 769-783 (2015).
- 735 22. Hansen, K.H. et al. A model for transmission of the H3K27me3 epigenetic mark. *Nat Cell Biol*  
736 **10**, 1291-300 (2008).
- 737 23. Margueron, R. et al. Role of the polycomb protein EED in the propagation of repressive histone  
738 marks. *Nature* **461**, 762-7 (2009).
- 739 24. Oksuz, O. et al. Capturing the Onset of PRC2-Mediated Repressive Domain Formation. *Mol Cell*  
740 **70**, 1149-1162 e5 (2018).
- 741 25. Alekseyenko, A.A., Gorchakov, A.A., Kharchenko, P.V. & Kuroda, M.I. Reciprocal interactions  
742 of human C10orf12 and C17orf96 with PRC2 revealed by BioTAP-XL cross-linking and affinity  
743 purification. *Proc Natl Acad Sci U S A* **111**, 2488-93 (2014).
- 744 26. Ragazzini, R. et al. EZHIP constrains Polycomb Repressive Complex 2 activity in germ cells. *Nat*  
745 *Commun* **10**, 3858 (2019).
- 746 27. Oliviero, G. et al. Dynamic Protein Interactions of the Polycomb Repressive Complex 2 during  
747 Differentiation of Pluripotent Cells. *Mol Cell Proteomics* **15**, 3450-3460 (2016).
- 748 28. Wassef, M. et al. EZH1/2 function mostly within canonical PRC2 and exhibit proliferation-  
749 dependent redundancy that shapes mutational signatures in cancer. *Proc Natl Acad Sci U S A*  
750 **116**, 6075-6080 (2019).
- 751 29. Jain, S.U. et al. PFA ependymoma-associated protein EZHIP inhibits PRC2 activity through a H3  
752 K27M-like mechanism. *Nat Commun* **10**, 2146 (2019).
- 753 30. Guo, A. et al. Immunoaffinity enrichment and mass spectrometry analysis of protein  
754 methylation. *Mol Cell Proteomics* **13**, 372-87 (2014).
- 755 31. Wang, X. et al. Regulation of histone methylation by automethylation of PRC2. *Genes Dev* **33**,  
756 1416-1427 (2019).
- 757 32. Lee, C.H. et al. Automethylation of PRC2 promotes H3K27 methylation and is impaired in  
758 H3K27M pediatric glioma. *Genes Dev* **33**, 1428-1440 (2019).
- 759 33. Shi, Y. et al. C10ORF12 modulates PRC2 histone methyltransferase activity and H3K27me3  
760 levels. *Acta Pharmacol Sin* **40**, 1457-1465 (2019).
- 761 34. He, Y. et al. The EED protein-protein interaction inhibitor A-395 inactivates the PRC2 complex.  
762 *Nat Chem Biol* **13**, 389-395 (2017).
- 763 35. Zhang, Q. et al. RNA exploits an exposed regulatory site to inhibit the enzymatic activity of  
764 PRC2. *Nat Struct Mol Biol* **26**, 237-247 (2019).

- 765 36. Long, Y. et al. Conserved RNA-binding specificity of polycomb repressive complex 2 is achieved  
766 by dispersed amino acid patches in EZH2. *Elife* **6**(2017).
- 767 37. Luger, K., Rechsteiner, T.J. & Richmond, T.J. Expression and purification of recombinant  
768 histones and nucleosome reconstitution. *Methods Mol Biol* **119**, 1-16 (1999).
- 769 38. Wang, X. et al. Molecular analysis of PRC2 recruitment to DNA in chromatin and its inhibition  
770 by RNA. *Nat Struct Mol Biol* **24**, 1028-1038 (2017).
- 771 39. Puda, A. et al. Frequent deletions of JARID2 in leukemic transformation of chronic myeloid  
772 malignancies. *Am J Hematol* **87**, 245-50 (2012).
- 773 40. Su, C.L., Deng, T.R., Shang, Z. & Xiao, Y. JARID2 inhibits leukemia cell proliferation by regulating  
774 CCND1 expression. *Int J Hematol* **102**, 76-85 (2015).
- 775 41. Andersson, L.C., Jokinen, M. & Gahmberg, C.G. Induction of erythroid differentiation in the  
776 human leukaemia cell line K562. *Nature* **278**, 364-5 (1979).
- 777 42. Andersson, L.C., von Willebrand, E., Jokinen, M., Karhi, K.K. & Gahmberg, C.G. Glycophorin A  
778 as an erythroid marker in normal and malignant hematopoiesis. *Haematol Blood Transfus* **26**,  
779 338-44 (1981).
- 780 43. Marsee, D.K., Pinkus, G.S. & Yu, H. CD71 (transferrin receptor): an effective marker for  
781 erythroid precursors in bone marrow biopsy specimens. *Am J Clin Pathol* **134**, 429-35 (2010).
- 782 44. Son, J., Shen, S.S., Margueron, R. & Reinberg, D. Nucleosome-binding activities within JARID2  
783 and EZH1 regulate the function of PRC2 on chromatin. *Genes Dev* **27**, 2663-77 (2013).
- 784 45. Perino, M. et al. MTF2 recruits Polycomb Repressive Complex 2 by helical-shape-selective DNA  
785 binding. *Nat Genet* **50**, 1002-1010 (2018).
- 786 46. Li, H. et al. Polycomb-like proteins link the PRC2 complex to CpG islands. *Nature* **549**, 287-291  
787 (2017).
- 788 47. Mozzetta, C. et al. The histone H3 lysine 9 methyltransferases G9a and GLP regulate polycomb  
789 repressive complex 2-mediated gene silencing. *Mol Cell* **53**, 277-89 (2014).
- 790 48. Maier, V.K. et al. Functional Proteomic Analysis of Repressive Histone Methyltransferase  
791 Complexes Reveals ZNF518B as a G9A Regulator. *Mol Cell Proteomics* **14**, 1435-46 (2015).
- 792 49. Wu, H. et al. Histone methyltransferase G9a contributes to H3K27 methylation in vivo. *Cell*  
793 *Res* **21**, 365-7 (2011).
- 794 50. Davidovich, C., Zheng, L., Goodrich, K.J. & Cech, T.R. Promiscuous RNA binding by Polycomb  
795 repressive complex 2. *Nat Struct Mol Biol* **20**, 1250-7 (2013).
- 796 51. Davidovich, C., Goodrich, K.J., Gooding, A.R. & Cech, T.R. A dimeric state for PRC2. *Nucleic*  
797 *Acids Res* **42**, 9236-48 (2014).
- 798 52. Luger, K., Rechsteiner, T.J. & Richmond, T.J. Preparation of nucleosome core particle from  
799 recombinant histones. *Methods Enzymol* **304**, 3-19 (1999).
- 800 53. Schneider, C.A., Rasband, W.S. & Eliceiri, K.W. NIH Image to ImageJ: 25 years of image analysis.  
801 *Nat Methods* **9**, 671-5 (2012).
- 802 54. Cox, J. & Mann, M. MaxQuant enables high peptide identification rates, individualized p.p.b.-  
803 range mass accuracies and proteome-wide protein quantification. *Nat Biotechnol* **26**, 1367-72  
804 (2008).
- 805 55. Madeira, F. et al. The EMBL-EBI search and sequence analysis tools APIs in 2019. *Nucleic Acids*  
806 *Res* **47**, W636-W641 (2019).
- 807 56. Aragao, D. et al. MX2: a high-flux undulator microfocus beamline serving both the chemical  
808 and macromolecular crystallography communities at the Australian Synchrotron. *J*  
809 *Synchrotron Radiat* **25**, 885-891 (2018).
- 810 57. McCoy, A.J. et al. Phaser crystallographic software. *J Appl Crystallogr* **40**, 658-674 (2007).
- 811 58. Winn, M.D. et al. Overview of the CCP4 suite and current developments. *Acta Crystallogr D*  
812 *Biol Crystallogr* **67**, 235-42 (2011).
- 813 59. Xu, C. et al. Binding of different histone marks differentially regulates the activity and  
814 specificity of polycomb repressive complex 2 (PRC2). *Proc Natl Acad Sci U S A* **107**, 19266-71  
815 (2010).



- 816 60. Murshudov, G.N., Vagin, A.A. & Dodson, E.J. Refinement of macromolecular structures by the  
817 maximum-likelihood method. *Acta Crystallogr D Biol Crystallogr* **53**, 240-55 (1997).
- 818 61. Liebschner, D. et al. Macromolecular structure determination using X-rays, neutrons and  
819 electrons: recent developments in Phenix. *Acta Crystallogr D Struct Biol* **75**, 861-877 (2019).
- 820 62. Emsley, P., Lohkamp, B., Scott, W.G. & Cowtan, K. Features and development of Coot. *Acta*  
821 *Crystallogr D Biol Crystallogr* **66**, 486-501 (2010).
- 822 63. Justin, N. et al. Structural basis of oncogenic histone H3K27M inhibition of human polycomb  
823 repressive complex 2. *Nat Commun* **7**, 11316 (2016).
- 824 64. Letunic, I. & Bork, P. Interactive Tree Of Life (iTOL) v4: recent updates and new developments.  
825 *Nucleic Acids Res* **47**, W256-W259 (2019).

826

827

828

829

830

831

832

833

834

835

836

837

838

839

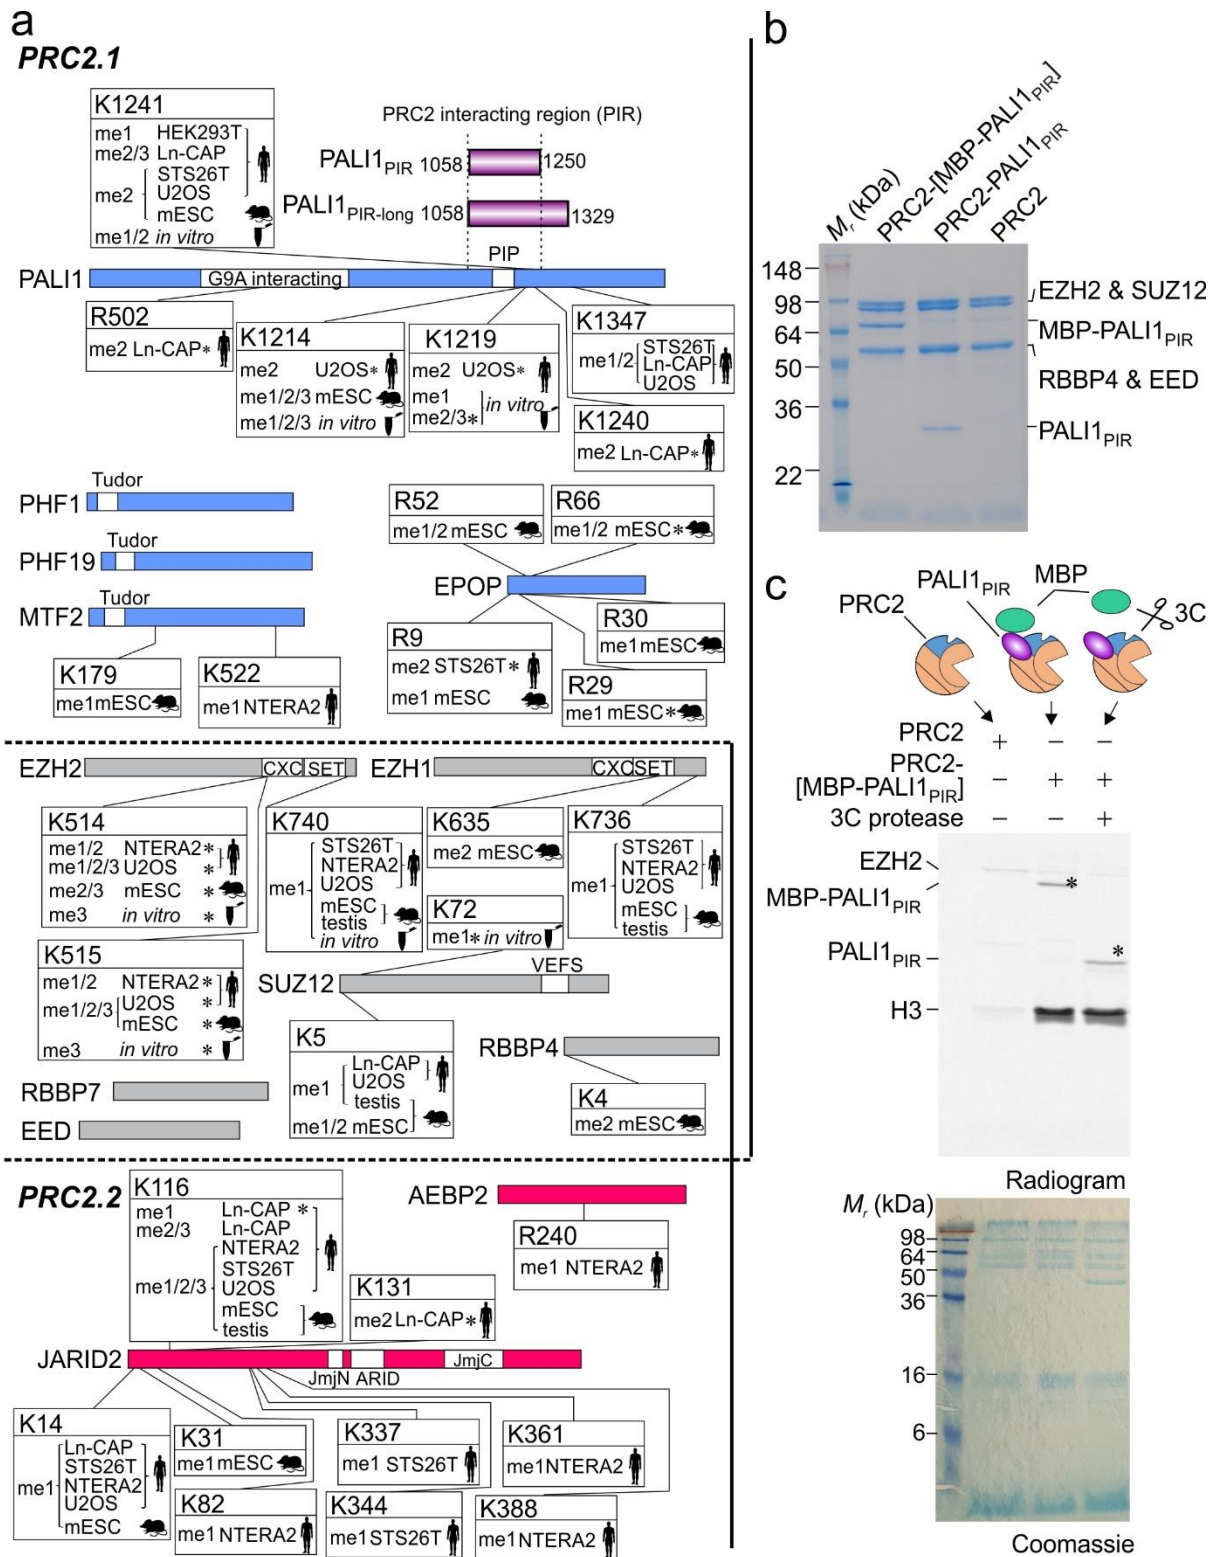

840

841 **Fig. 1. PALI1 is methylated *in vitro* and *in vivo*.**

842 **a**, Schematic representation of the PRC2 methylome *in vivo* and *in vitro*, as identified from MS/MS  
 843 data. Mouse and human icon represent the organism of origin and cell lines are indicated (see  
 844 methods section for references and accession numbers of the raw MS/MS data). Test tube icons  
 845 representing methylations in the purified recombinant human PRC2-PALI1<sub>PIR-long</sub>. PALI truncations  
 846 used in this study are indicated in purple (upper right). Residues are indicated with asterisks where  
 847 the position probability of the methylation is less than 0.95 (see Supplementary Table 1 for the

848 values). PRC2.1 and PRC2.2 accessory subunits are in blue and red, respectively, and core subunits  
849 are in grey. **b**, Coomassie blue-stained SDS-PAGE of recombinant human PRC2-PAL1<sub>PIR</sub> complexes, as  
850 indicated. **c**, HTMase assay of the PRC2-[MBP-PAL1<sub>PIR</sub>] complex using mononucleosomes substrate  
851 were carried out in the presence or absence of C3 protease to confirm that PAL1<sub>PIR</sub> is methylated.  
852 The MBP-cleaved and uncleaved PAL1<sub>PIR</sub> bands are indicated on the radiogram with asterisks.

853

854

855

856

857

858

859

860

861

862

863

864

865

866

867

868

869

870

871

872

873

874

875

876

877

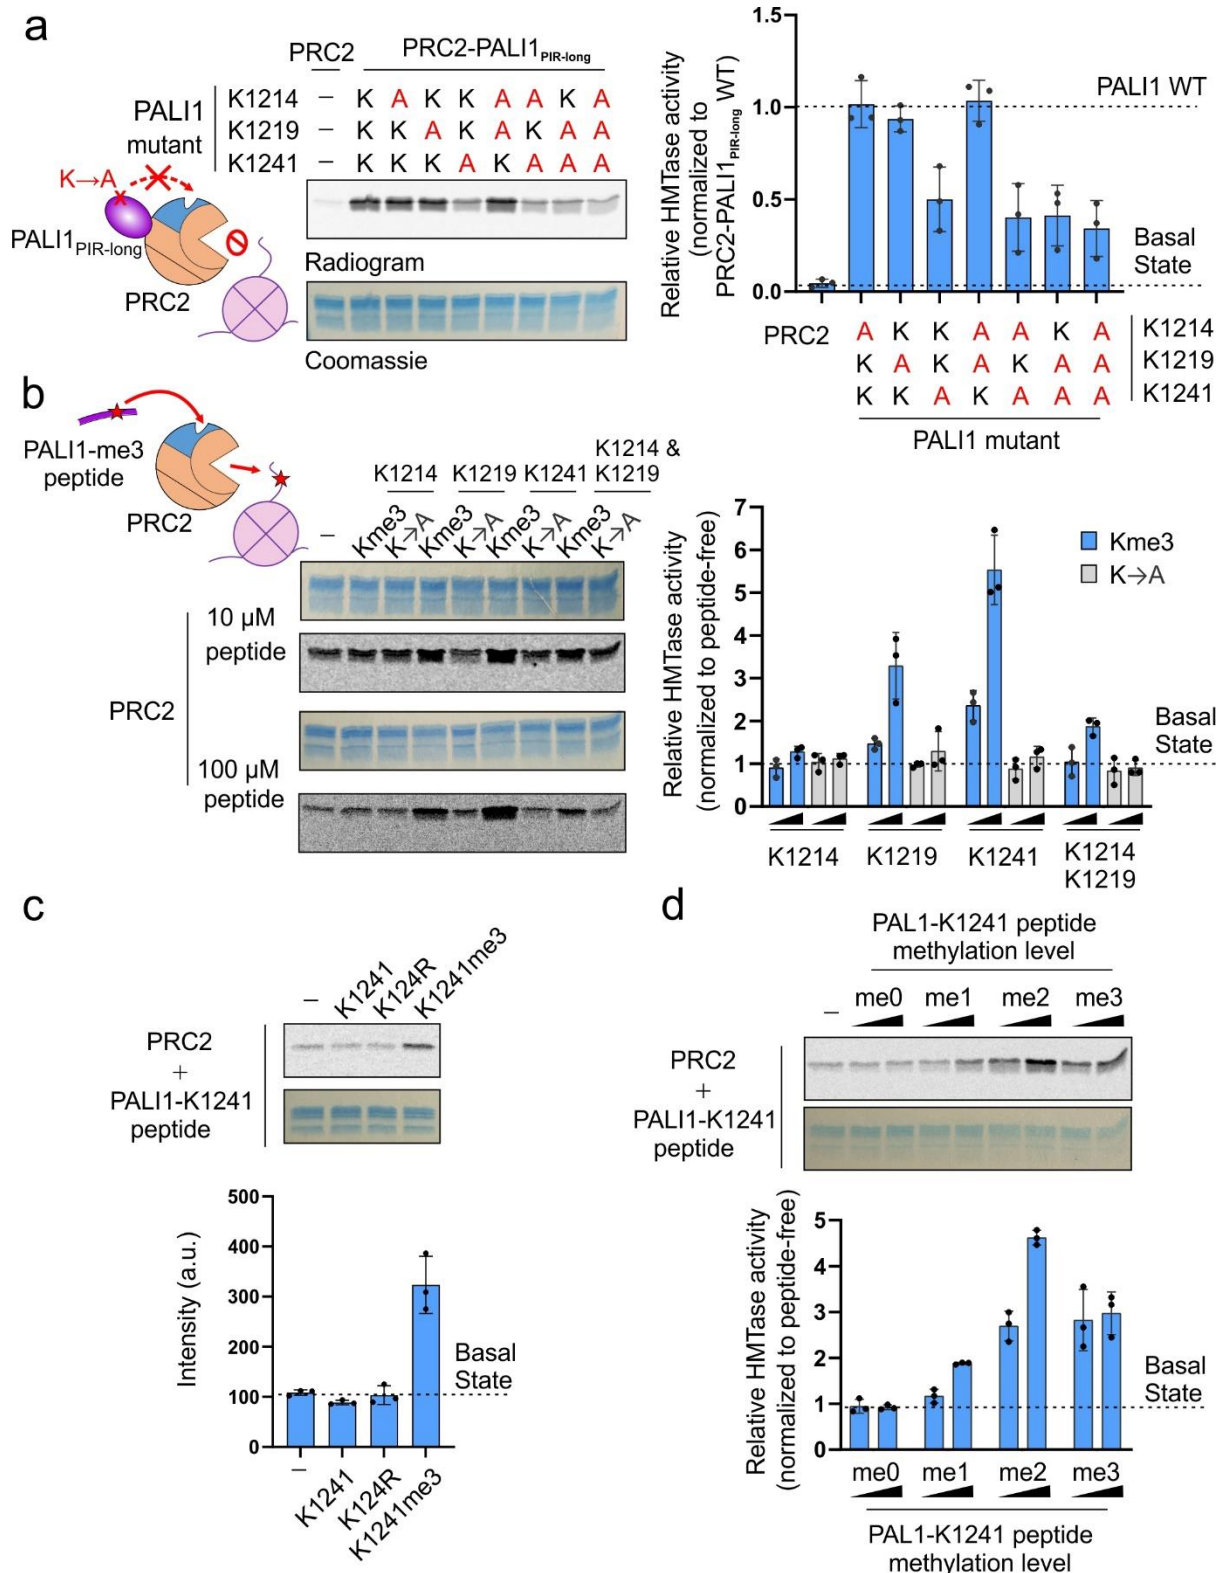

878

879 **Fig. 2. PALI1 K1241 is required and PALI1-K1241me2/3 is sufficient to stimulate the HMTase**  
880 **activity of PRC2.**

881 **a**, HMTase assays were carried out using 500 nM of wild type or mutant recombinant complexes, as  
882 indicated, using 2 μM mononucleosomes substrate. The bar plot (right) represents mean HMTase  
883 activities, quantified using densitometry and normalized to the activity of the wild-type PRC2-  
884 PALI1<sub>PIR-long</sub>. Dash lines indicate the activity of the wild-type PRC2-PALI1<sub>PIR-long</sub> (upper line) and the  
885 core PRC2 (bottom line) complexes. **b**, HMTase assay performed with 500 nM PRC2, 2 μM

886 mononucleosomes and in the presence or absence of either 10  $\mu$ M or 100  $\mu$ M PALI1 peptide, as  
887 indicated. The bar plot (right) represents the relative HMTase activities of PRC2 in the presence of  
888 tri-methylated (blue) or K-to-A mutated (grey) PALI1 peptides, as indicated. **c**, HMTase assays of  
889 PRC2 performed as above, in the presence or absence of PALI1-K1241 peptides, as indicated. **d**,  
890 HMTase assays of PRC2 performed as above, in the presence or absence of PALI1-K1241 peptides  
891 with different methylation states, as indicated. The bar plots in (**b-d**) represents the relative HMTase  
892 activities, normalized to the HMTase activity of PRC2 in its basal state (dashed line). The bar plots in  
893 all panels represent the mean of the quantification performed using densitometry over three  
894 independent replicates. Error bars shown in this Figure represent standard deviation with the  
895 observed values plotted as dots. Uncropped gel images used to generate this figure are in  
896 Supplementary Fig. 2.

897

898

899

900

901

902

903

904

905

906

907

908

909

910

911

912

913

914

915

916

917

918

919

920

921

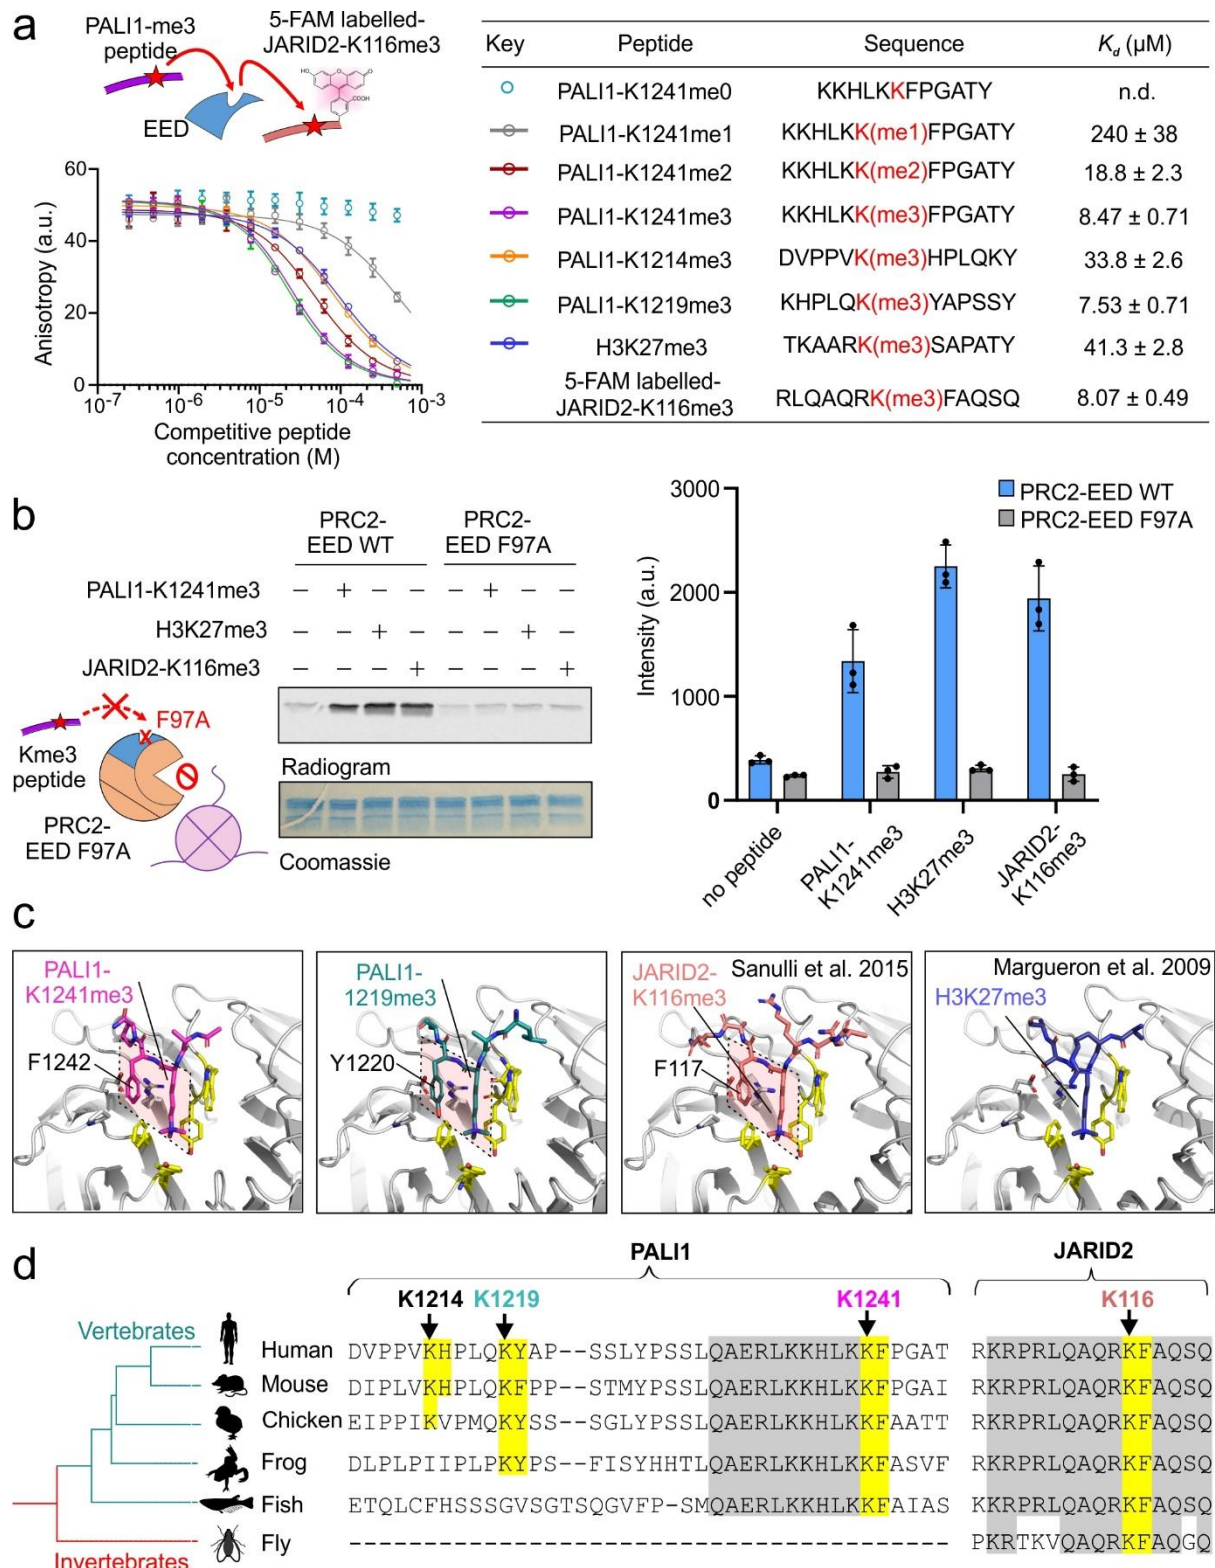

**Fig. 3. Structural basis for a convergent evolution between PALI1 to JARID2.**

922 **a**, Fluorescence anisotropy displacement titrations, where unlabelled peptides competed a 5-FAM  
 923 labelled JARID2-K116me3 peptide (40 nM) for binding to EED (10  $\mu\text{M}$ ). Error bars represent standard  
 924 deviation over three independent replicates that were carried out on different days. Dissociation  
 925 constants ( $K_d$ ) and 95% confidence bounds on the coefficient are indicated in the table. The  
 926 sequence of the peptides indicated in the table, with the methyl-lysine in red. See Supplementary  
 927 Fig. 3a for the binding curve of the 5-FAM labelled JARID2-K116me3 to EED. **b**, HMTase assay  
 928  
 929

930 performed using wild type (WT) or cage-mutant PRC2 (EED F97A) in the presence or absence of  
931 stimulatory peptides, as indicated. The bar plot represents the means of quantification using  
932 densitometry done on three independent replicates. Error bars represent standard deviation and the  
933 observed values indicated in dots. **c**, High-resolution crystal structures of EED in a complex with  
934 either PALI1-K1241me3 (PDB 6V3X; this study), PALI1-K1219me3 (PDB 6V3Y; this study), JARDI2-  
935 K116me3 (PDB 4X3E; Sanulli et al 2015) and EED-H3K27me3 (PDB 3IIW; Margueron et al. 2009), as  
936 indicated. The methylated lysines and their +1 adjacent conserved aromatic residues are labelled  
937 and marked in quadrilaterals. The side chains of the -1 adjacent residues to the tri-methyl-lysines—  
938 K1240 in PALI1-K1241me3 and Q1218 in PALI1-K1219me3—could not be traced and are likely  
939 disordered. The tri-methyl-lysine peptides are in sticks representation in assorted colours and EED is  
940 in grey cartoon representation, with the exception of yellow sticks that represent the aromatic cage  
941 amino acids of EED and grey sticks that represent amino acids of EED at the vicinity of the +1  
942 conserved aromatic residue of the peptides. See Supplementary Fig. 3c for the omit electron  
943 densities of PALI1-K1241me3 and PALI1-K1219me3 peptides and Supplementary Fig. 3d, e for the  
944 sequence alignments and phylogenetic analysis. **d**, Multiple sequence alignments was carried out  
945 using T-coffee<sup>55</sup> on entire protein sequences with the relevant regions presented (the following  
946 species were used: Homo sapiens, Mus musculus, Gallus gallus, Xenopus laevis, Oryzias latipes and  
947 Drosophila melanogaster. Phylogenetic tree was constructed based on NCBI taxonomy and  
948 visualized using iTOL<sup>64</sup>. The methylated lysines of JARID2 and PALI1 are labelled with arrows  
949 coloured using the same colour code as in panel c, with both the lysines and their adjacent aromatic  
950 residues are highlighted in yellow. Other vertebrate-conserved amino acids that are highlighted in  
951 grey.

952

953

954

955

956

957

958

959

960

961

962

963

964

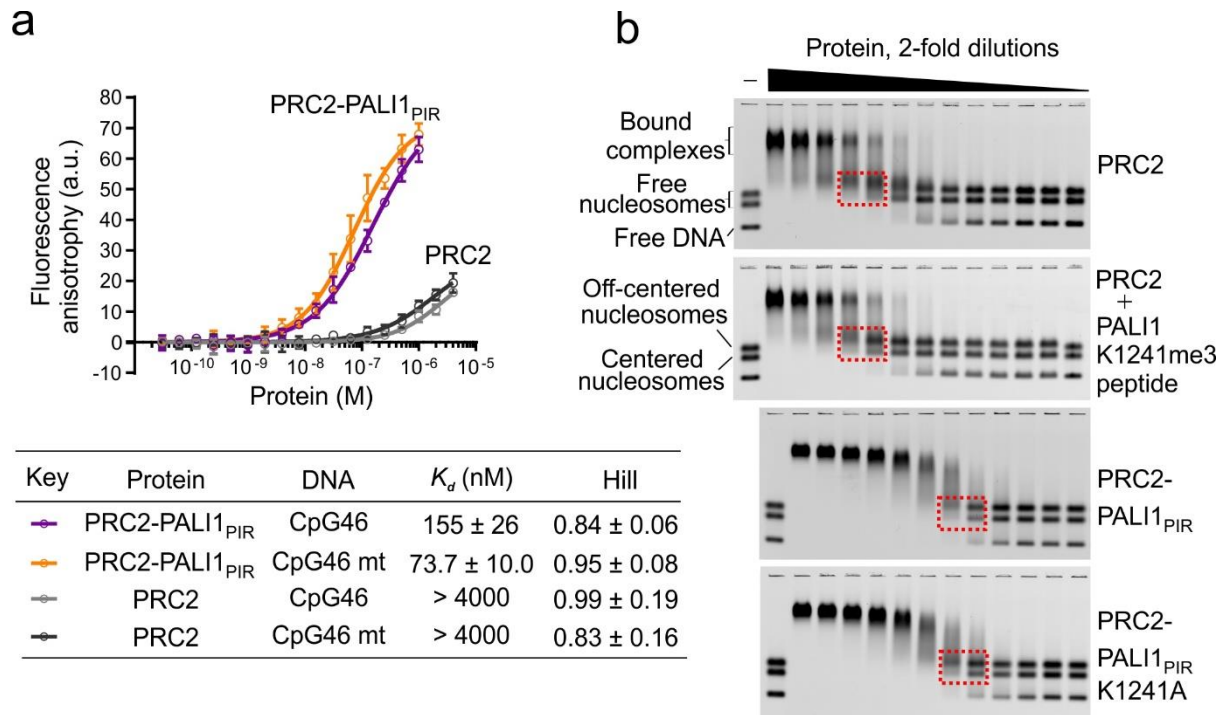

965

966 **Fig. 4. PALI1 facilitates DNA binding by PRC2.**

967 **a**, Fluorescence anisotropy used to quantify the affinity of PRC2 complexes to fluorescein-labelled  
 968 CpG46 or CpG46 mt DNA. Data represent the mean of three independent experiments that were  
 969 carried out on different days and error bars represent standard deviation. Dissociation constants ( $K_d$ )  
 970 and Hill coefficients are indicated in the table, including their standard error. **b**, EMSA used to  
 971 quantify the affinity of the indicated PRC2 complexes for a mixture of Cy5-labelled  
 972 mononucleosomes and free DNA of the same sequence. Dashed boxes indicate the  
 973 mononucleosome bands near the  $K_d$  concentration of the protein, where half of the labelled  
 974 mononucleosomes are shifted (for quantification, see Supplementary Fig. 4b and c).



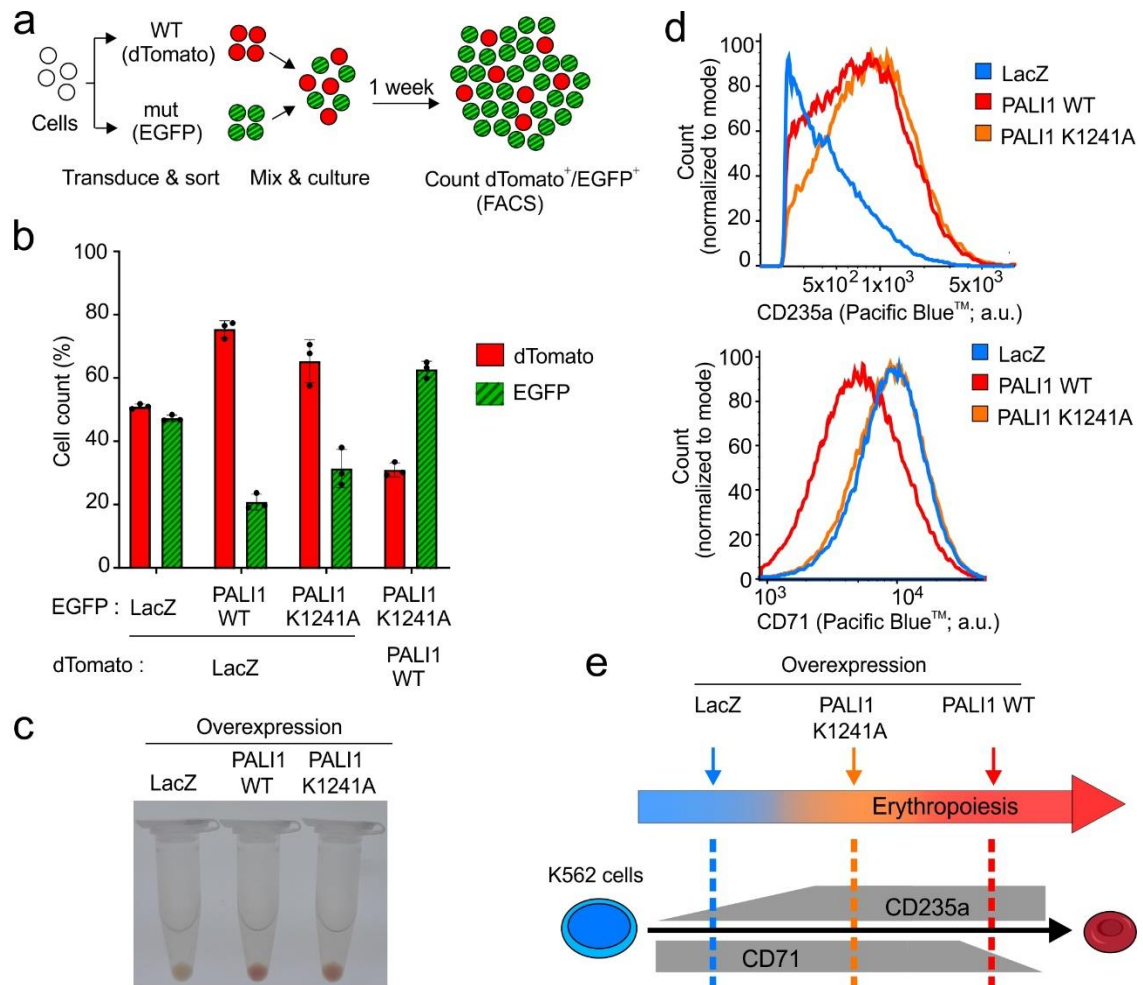

975  
976  
977

**Fig. 5. Overexpression of PALI1 triggers K562 cell differentiation along the erythroid lineage, with the effect alleviated by a separation-of-function allosteric-defective PALI1 mutant (K1241A)**

978 **a**, Schematic illustration of the competitive cell proliferation assay used to directly compare the  
979 proliferation of cells transduced with different constructs. Cells overexpressing different proteins  
980 and fluorophores are co-cultured, with the higher-proliferating cells outcompete the lower-  
981 proliferating cells. At the end of the experiment, the number of cells carries each vector is quantified  
982 using flow cytometry. **b**, Competitive cell proliferation assay of human chronic myeloid leukemia  
983 (K562) cells overexpressing either PALI1 wild type (WT), the separation-of-function PALI1 mutant  
984 (K1241A) or the LacZ negative control, as indicated. The bar plot represents the mean percentage of  
985 each cell population after 7 days of competition, as quantified using flow cytometry. Error bars  
986 represent standard deviations derived from three independent experiments carried out on different  
987 days with the observed values indicated by dots. Evidence for protein expression and nuclear  
988 localization are in Supplementary Fig. 5a. **c**, Colour photographs of pelleted K562 cells  
989 overexpressing different proteins: LacZ (left), PALI1 WT (middle) and PALI1-K1241A mutant (right). **d**,  
990 Representative histograms generated from flow cytometric analysis of the differentiation markers  
991 CD235a (top) and CD71 (bottom) exhibited by K562 cells overexpressing PALI1 WT (red), PALI1  
992 K1241A mutant (orange) or LacZ (blue). The other two replicates shown in Supplementary Fig. 5c,  
993 and evidence for protein expression are in Supplementary Fig 5a. **e**, Illustration of the expected  
994 expression level of CD235a and CD71 during erythropoiesis (grey) and the actual observed values  
995 represented in dashed lines coloured in red, orange and blue for PALI1 WT, PALI1 K1241A and the  
996 negative control LacZ, respectively.

997

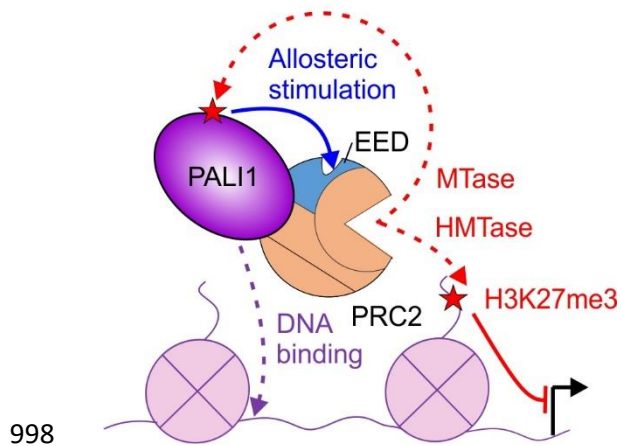

998

999 **Fig. 6. A model for PALI1-mediated regulation of PRC2:** PALI1 regulates PRC2 through two  
1000 independent mechanisms: (i) PRC2 methylates PALI1 K1241, and possibly K1219, which then binds to  
1001 the regulatory subunit EED to trigger an allosteric activation of PRC2. (ii) PALI1 facilitates DNA  
1002 binding and nucleosome substrate binding. PALI1 is in deep purple, EED in light blue and other PRC2  
1003 core subunits are in orange. Dashed red arrows represent methylation, with the red stars represent  
1004 methyl-lysines. The blue arrow represents a positive regulation by an allosteric activation, the  
1005 dashed purple arrow represents DNA binding and the continues red arrow represents a  
1006 transcriptional repression.

1007

1008

1009

1010

1011

1012

1013

1014

1015

1016

1017

1018

1019

1020

1021

1022

1023

1024

1025

1026

1027

1028 **Table 1. X-ray crystallography data collection and refinement statistics.**

|                                        | PAL11-K1241me3 (PDB:6V3X) | PAL11-K1219me3 (PDB:6V3Y) |
|----------------------------------------|---------------------------|---------------------------|
| <b>Data collection</b>                 |                           |                           |
| Space group                            | $P 2_12_12_1$             | $P 2_12_12_1$             |
| Cell dimensions                        |                           |                           |
| $a, b, c$ (Å)                          | 56.2, 84.7, 90.4          | 57.8, 85.3, 91.1          |
| $\alpha, \beta, \gamma$ (°)            | 90.0, 90.0, 90.0          | 90.0, 90.0, 90.0          |
| Resolution (Å)                         | 47.76-1.70                | 48.79-1.63                |
| $R_{\text{sym}}$ or $R_{\text{merge}}$ | 0.066 (0.631)             | 0.074 (0.643)             |
| $I/\sigma I$                           | 16.5 (2.8)                | 16.2 (3.2)                |
| Completeness (%)                       | 97.8 (96.5)               | 99.7 (97.9)               |
| Redundancy                             | 7.6 (8.0)                 | 8.1 (8.1)                 |
| <b>Refinement</b>                      |                           |                           |
| Resolution (Å)                         | 35.2-1.70                 | 48.8-1.63                 |
| No. reflections                        | 47039(4553)               | 56904(5630)               |
| $R_{\text{work}} / R_{\text{free}}$    | 0.174/0.200               | 0.165/0.193               |
| <b>No. atoms</b>                       |                           |                           |
| Protein (chain A)                      | 2850                      | 2898                      |
| Ligand (chain B)                       | 39                        | 42                        |
| Water                                  | 178                       | 267                       |
| <b>B-factors</b>                       |                           |                           |
| Protein                                | 22.9                      | 18.0                      |
| Ligand/ion                             | 29.1                      | 24.6                      |
| Water                                  | 30.1                      | 27.4                      |
| <b>R.M.S. deviations</b>               |                           |                           |
| Bond lengths (Å)                       | 0.006                     | 0.006                     |
| Bond angles (°)                        | 0.84                      | 0.89                      |
| <b>Ramachandran plot</b>               |                           |                           |
| Favoured regions (%)                   | 96.6                      | 96.4                      |
| Allowed regions (%)                    | 3.4                       | 3.6                       |
| Disallowed regions (%)                 | 0.0                       | 0.0                       |

1029 Values in parentheses are for the highest-resolution shell.

1030
